# Supplementary material for: Synthesis, photophysical and electronic properties of tetra-donor- or acceptor-substituted ortho-perylenes displaying four reversible oxidations or reductions
Source: PubMed Central journal article supplement — Chem Sci. 2019 Jun 24;10(32):7516–34. doi: 10.1039/c9sc02420d (PMC6761871; doi:10.1039/c9sc02420d), 2019-06-24
Supplement: SC-010-C9SC02420D-s001.pdf [file SC-010-C9SC02420D-s001.pdf]

**Synthesis, Photophysical and Electronic Properties of Tetra- Donor- or  
Acceptor-Substituted *ortho*-Perylenes Displaying Four Reversible Oxidations  
or Reductions**

**Electronic Supporting Information**

Julia Merz, Andreas Steffen, Jörn Nitsch, Julian Fink, Claudia B. Schürger, Alexandra  
Friedrich, Ivo Krummenacher, Holger Braunschweig, Michael Moos, David Mims,  
Christoph Lambert, Todd B. Marder\*

**Contents**

|                                         |         |
|-----------------------------------------|---------|
| UV-Vis, Emission and Excitation Spectra | S1      |
| Spectroelectrochemistry                 | S2-S7   |
| NMR Spectra                             | S8-S14  |
| Crystallographic Data                   | S15-S19 |
| TD-DFT Results                          | S20-S23 |
| Orbital Depictions                      | S24-S25 |
| Cartesian Coordinates                   | S26-S36 |

## UV-Vis Absorption and Emission Spectra

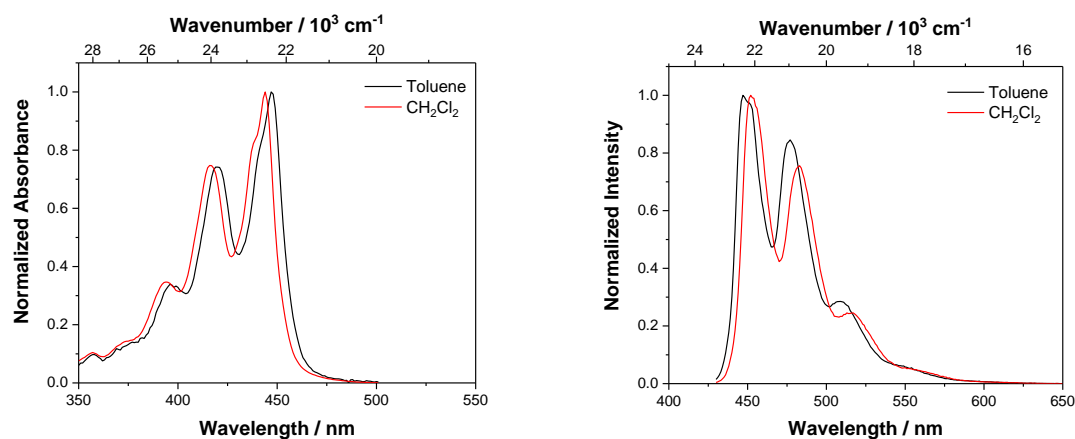

Figure S1. Left: absorption spectra; right: emission spectra of  $(\text{Br})_4\text{-Per}$  in toluene and  $\text{CH}_2\text{Cl}_2$ .

## Excitation Spectra

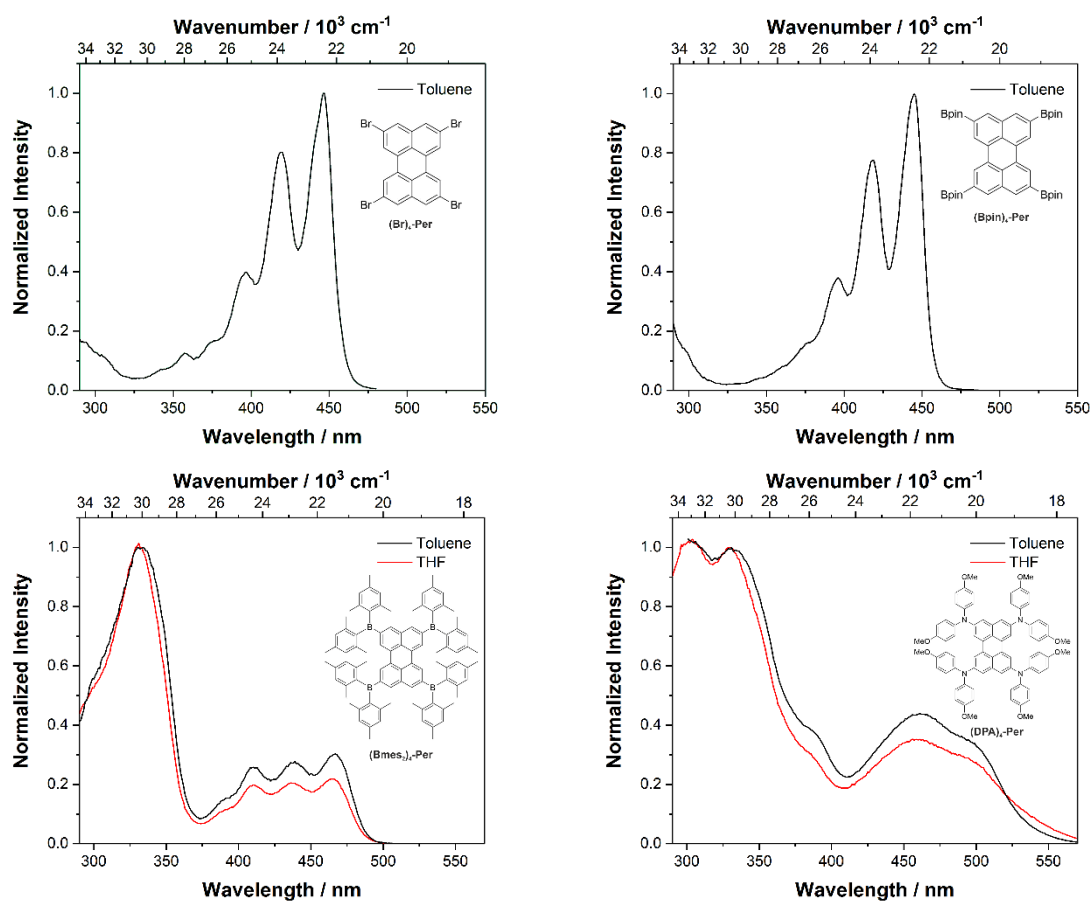

Figure S2. Excitation spectra of compounds  $(\text{Br})_4\text{-Per}$  (top left) and  $(\text{Bpin})_4\text{-Per}$  (top right) in toluene,  $(\text{Bmes}_2)_4\text{-Per}$  (bottom left) and  $(\text{DPA})_4\text{-Per}$  (bottom right) in toluene and in THF.

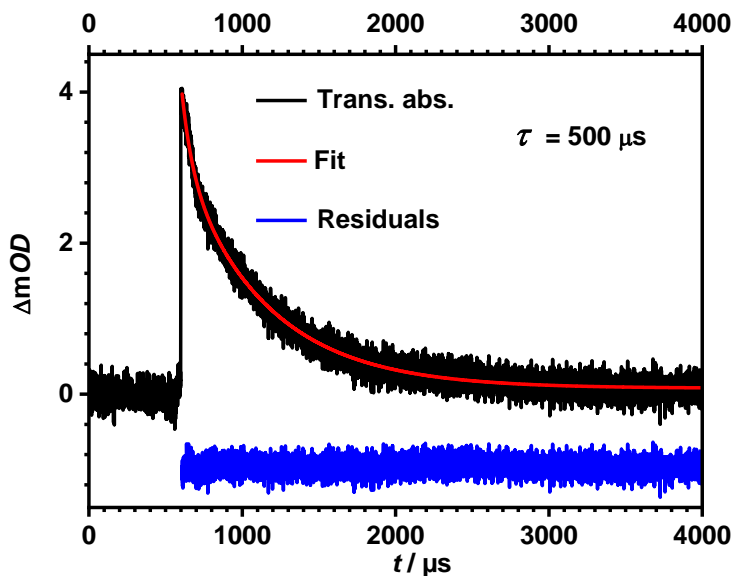

**Figure S3.** Transient absorption decay curve of **(DPA)<sub>4</sub>-Per** at 460-550 nm and fit (red).

### Spectroelectrochemistry

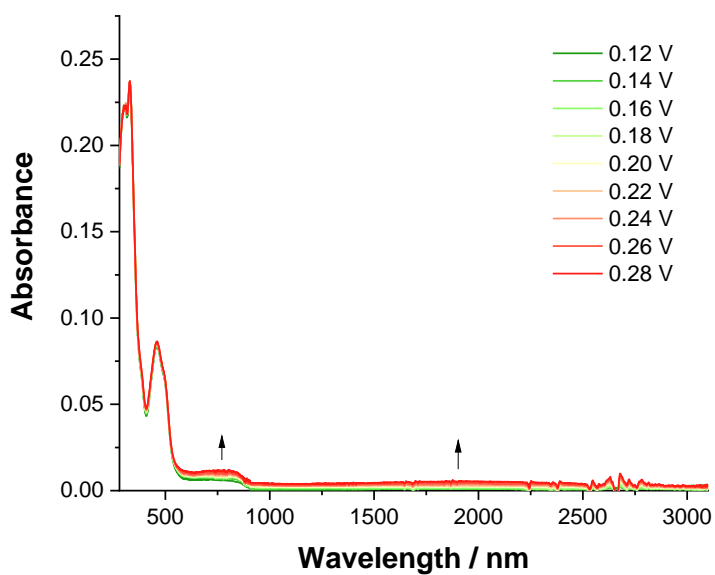

**Figure S4.** Absorption spectra of **(DPA)<sub>4</sub>-Per** recorded by spectroelectrochemical measurements (by increasing the applied potential stepwise from 0.12-0.28 V and recording the respective absorption spectrum) in CH<sub>2</sub>Cl<sub>2</sub>.

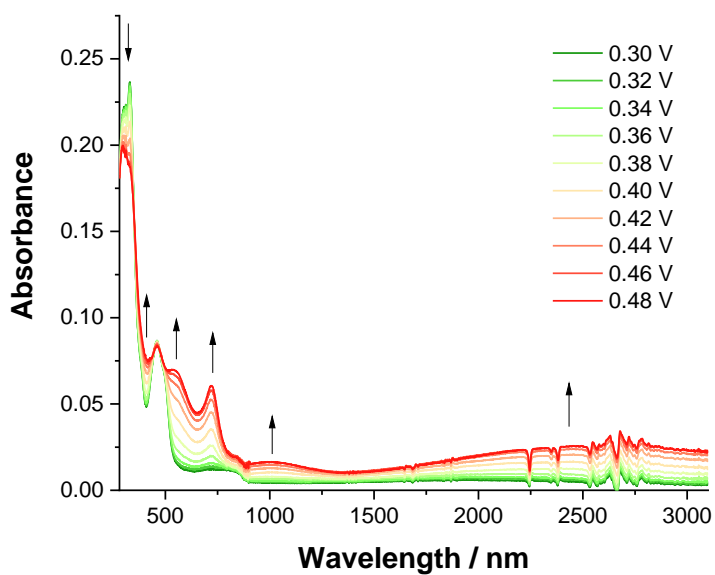

**Figure S5.** Absorption spectra of **(DPA)<sub>4</sub>-Per** recorded by spectroelectrochemical measurements (by increasing the applied potential stepwise from 0.30-0.48 V and recording the respective absorption spectrum) in CH<sub>2</sub>Cl<sub>2</sub>.

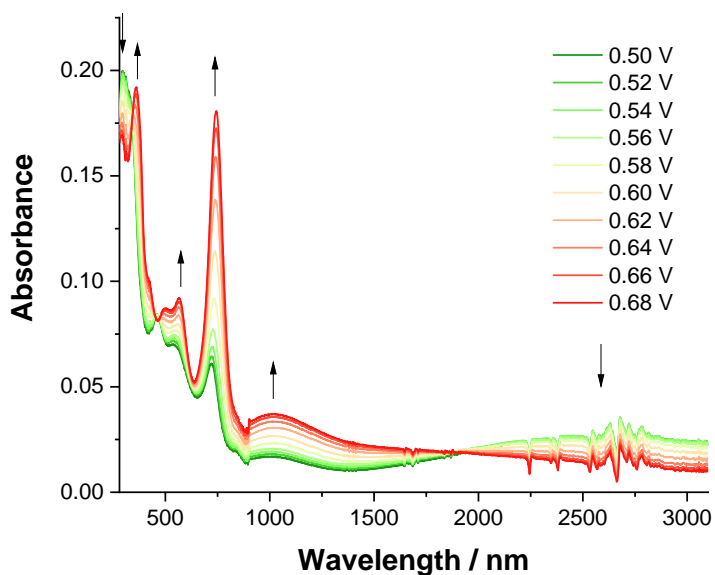

**Figure S6.** Absorption spectra of **(DPA)<sub>4</sub>-Per** recorded by spectroelectrochemical measurements (by increasing the applied potential stepwise from 0.50-0.68 V and recording the respective absorption spectrum) in CH<sub>2</sub>Cl<sub>2</sub>.

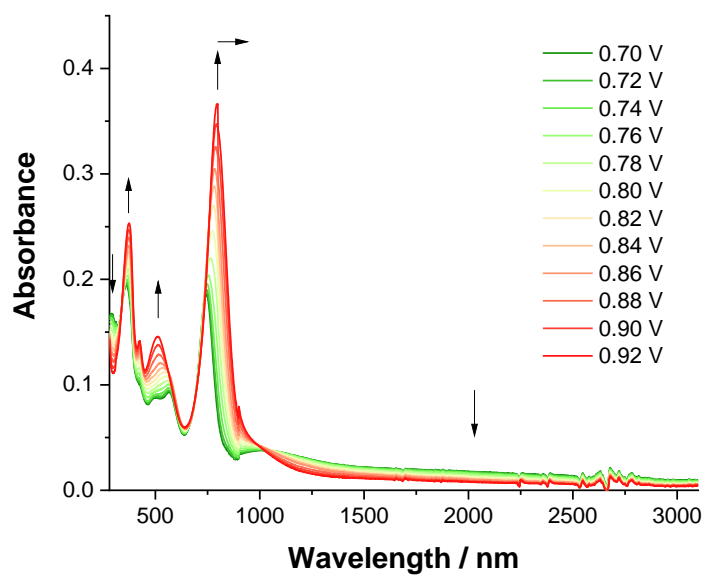

**Figure S7.** Absorption spectra of **(DPA)<sub>4</sub>-Per** recorded by spectroelectrochemical measurements (by increasing the applied potential stepwise from 0.70-0.92 V and recording the respective absorption spectrum) in CH<sub>2</sub>Cl<sub>2</sub>.

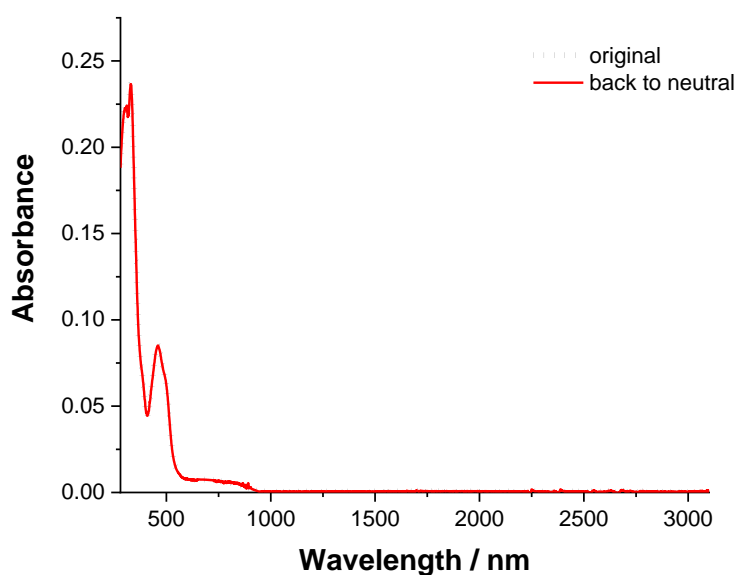

**Figure S8.** Control absorption spectra of **(DPA)<sub>4</sub>-Per** recorded by spectroelectrochemical measurements before (dotted, black) and after (red) increasing the applied potential stepwise in CH<sub>2</sub>Cl<sub>2</sub>.

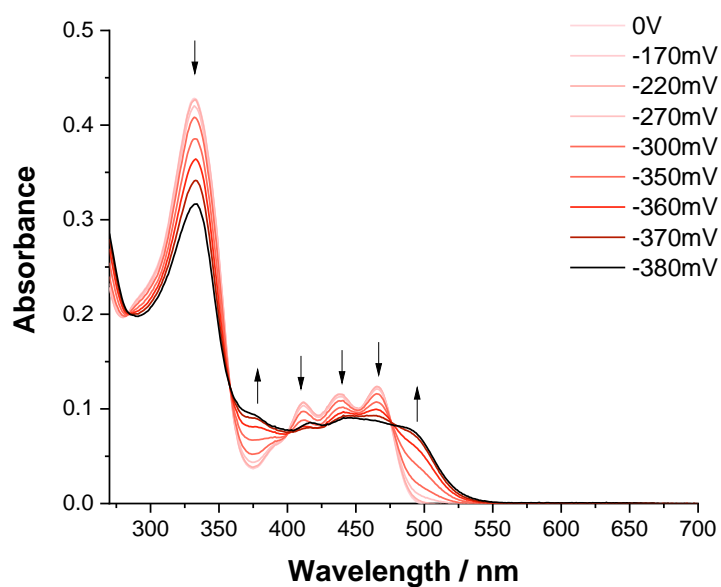

**Figure S9.** Absorption spectra of **(Bmes<sub>2</sub>)<sub>4</sub>-Per** recorded by spectroelectrochemical measurements (by increasing the applied potential stepwise from 0(-0.38) V and recording the respective absorption spectrum) in THF.

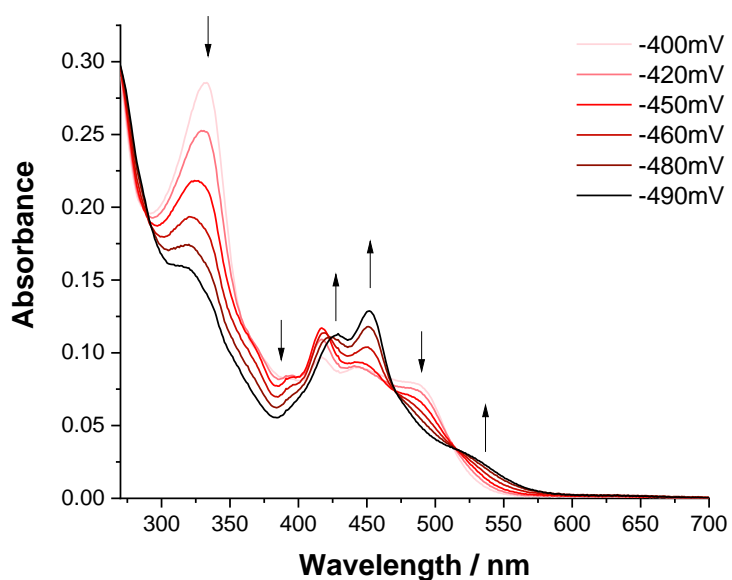

**Figure S10.** Absorption spectra of **(Bmes<sub>2</sub>)<sub>4</sub>-Per** recorded by spectroelectrochemical measurements (by increasing the applied potential stepwise from (-0.40)-(-0.49) V and recording the respective absorption spectrum) in THF.

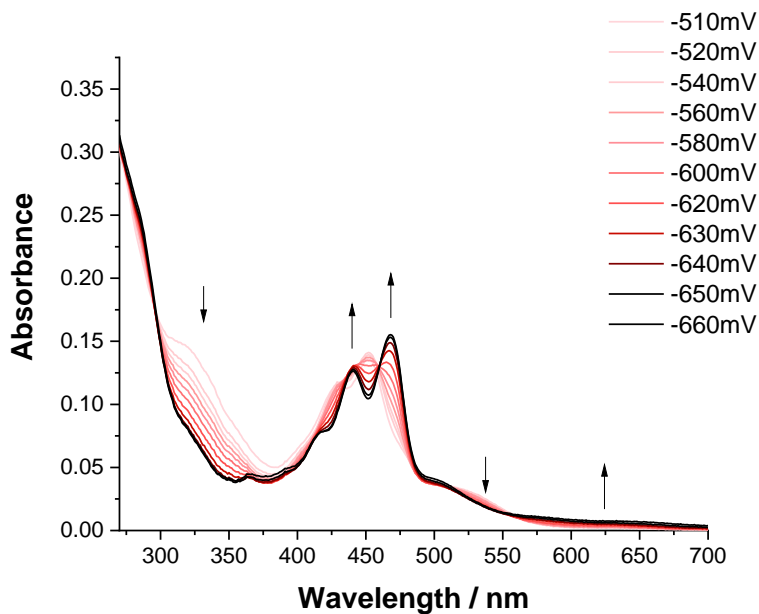

**Figure S11.** Absorption spectra of  $(\text{Bmes}_2)_4\text{-Per}$  recorded by spectroelectrochemical measurements (by increasing the applied potential stepwise from (-0.51)-(-0.66) V and recording the respective absorption spectrum) in THF.

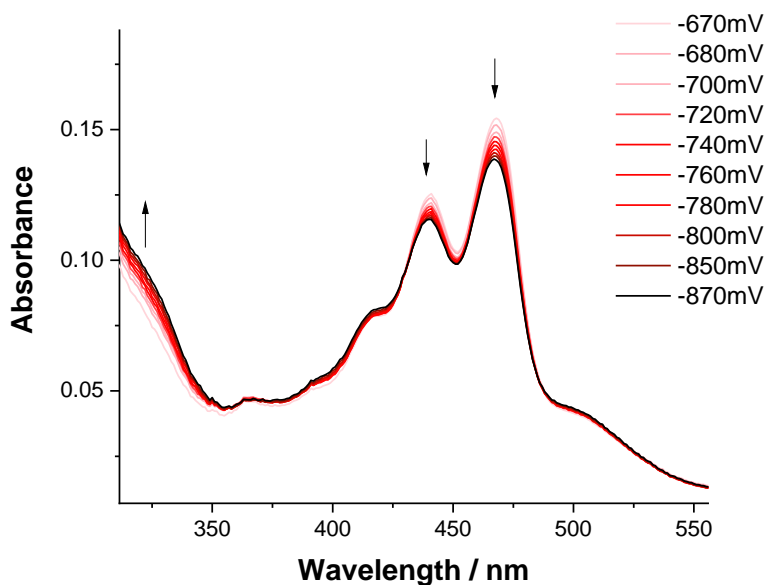

**Figure S12.** Absorption spectra of  $(\text{Bmes}_2)_4\text{-Per}$  recorded by spectroelectrochemical measurements (by increasing the applied potential stepwise from (-0.67)-(-0.87) V and recording the respective absorption spectrum) in THF.

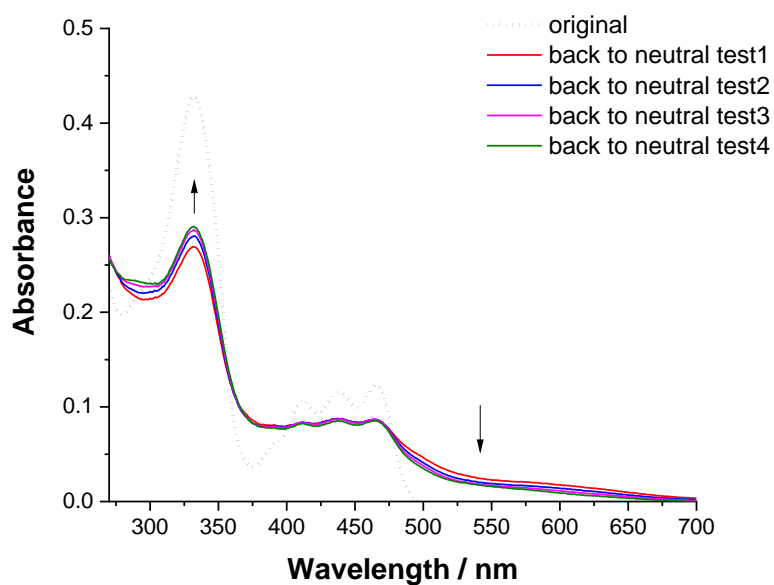

**Figure S13.** Control absorption spectra of (Bmes<sub>2</sub>)<sub>4</sub>-Per recorded by spectroelectrochemical measurements before (black dotted line) and after (solid lines) increasing the applied potential stepwise in THF.



## NMR Spectra

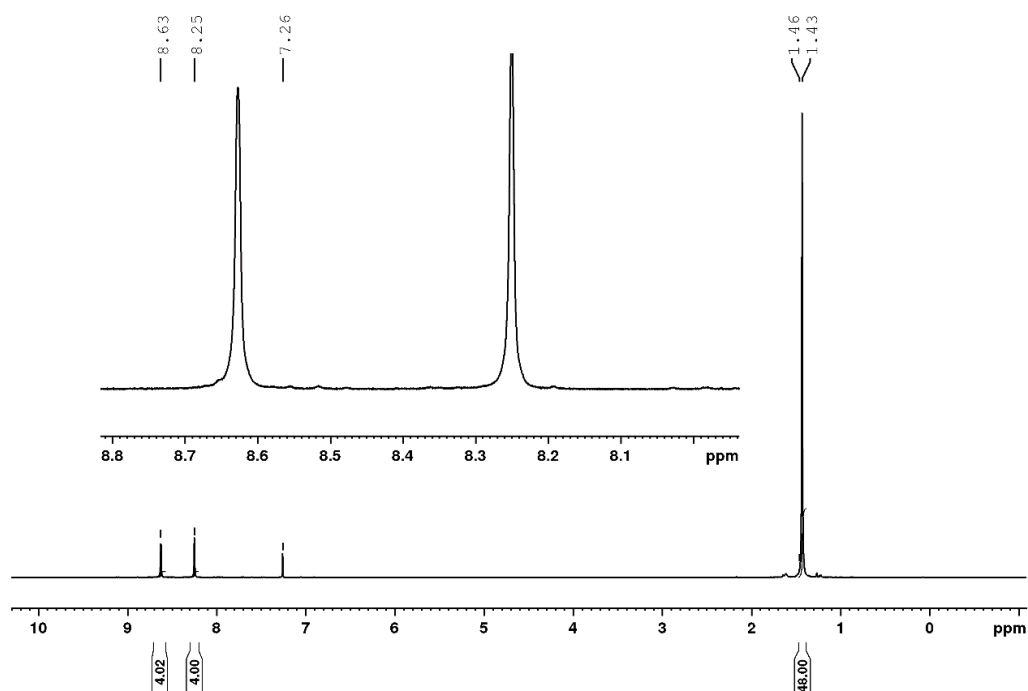

Figure S14. <sup>1</sup>H NMR spectrum of (Bpin)<sub>4</sub>-Per in CDCl<sub>3</sub> at 300 MHz.

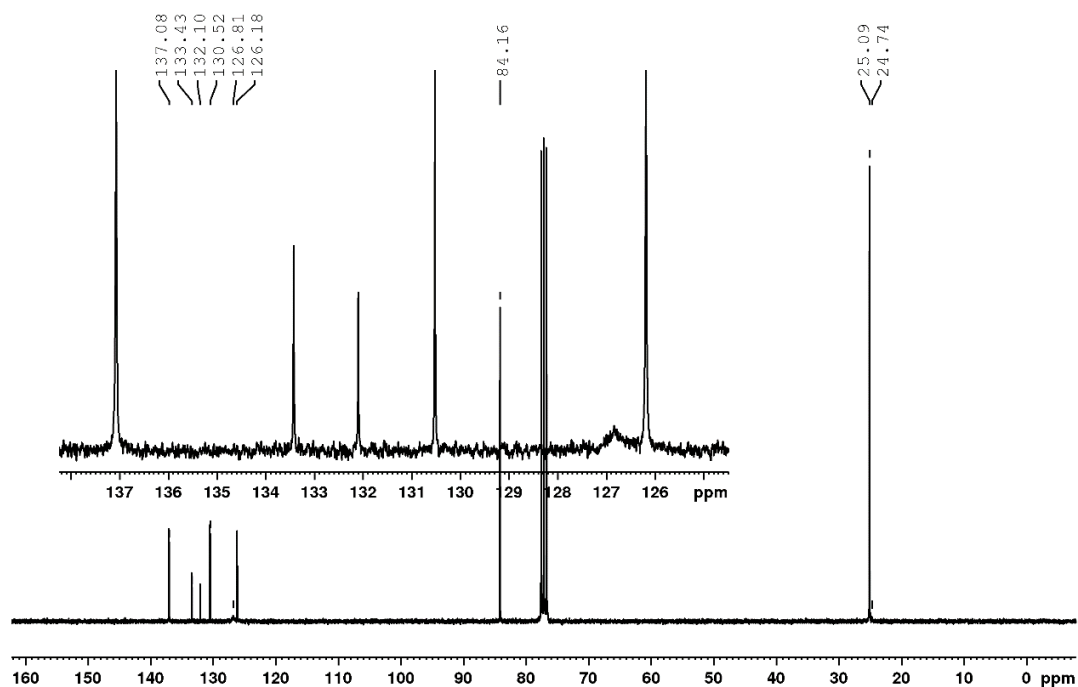

Figure S15. <sup>13</sup>C{<sup>1</sup>H} NMR spectrum of (Bpin)<sub>4</sub>-Per in CDCl<sub>3</sub> at 75 MHz.

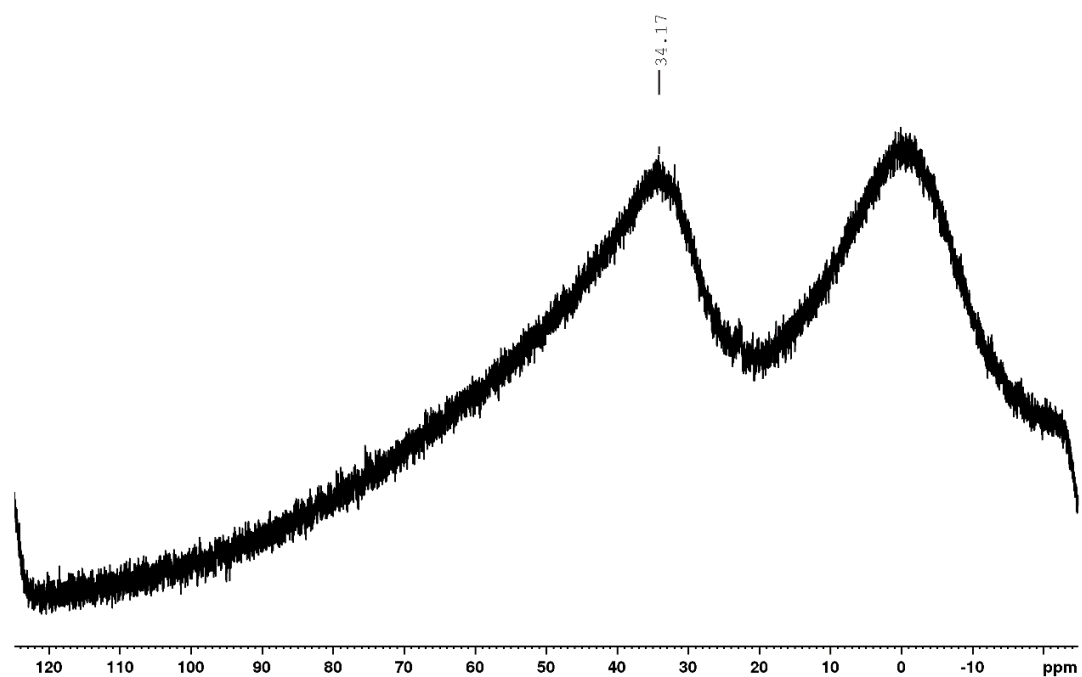

**Figure S16.**  $^{11}\text{B}\{^1\text{H}\}$  NMR spectrum of **(Bpin)<sub>4</sub>-Per** in  $\text{CDCl}_3$  at 75 MHz.

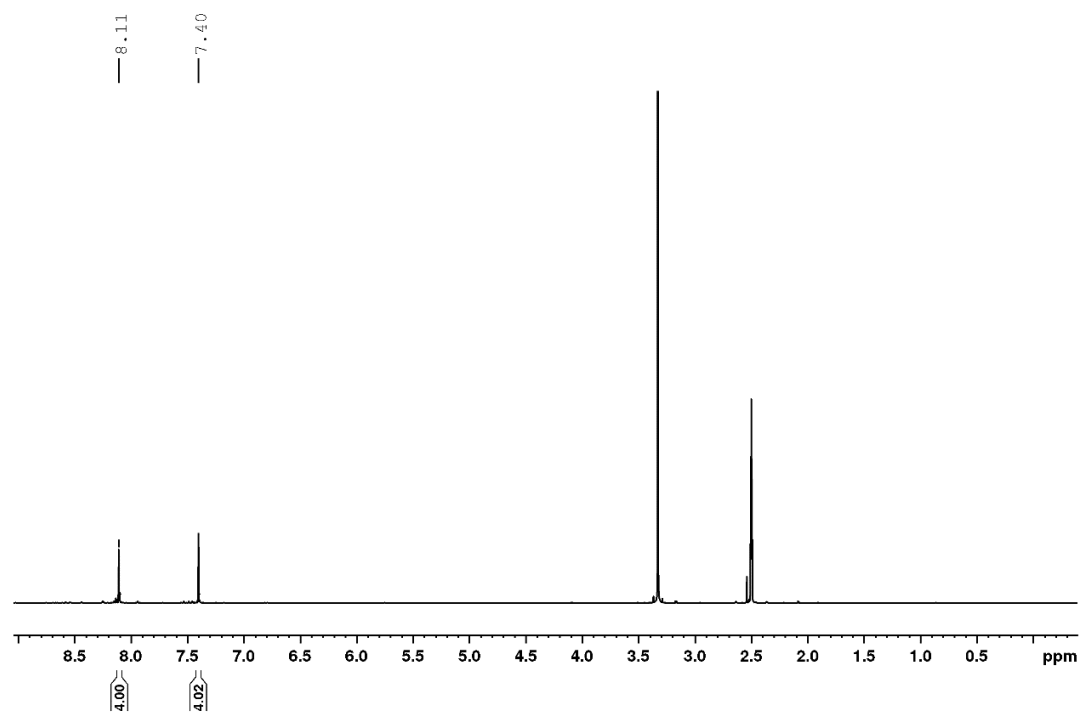

**Figure S17.**  $^1\text{H}$  NMR spectrum of **(BF<sub>3</sub>K)<sub>4</sub>-Per** in  $\text{DMSO-}d_6$  at 500 MHz.

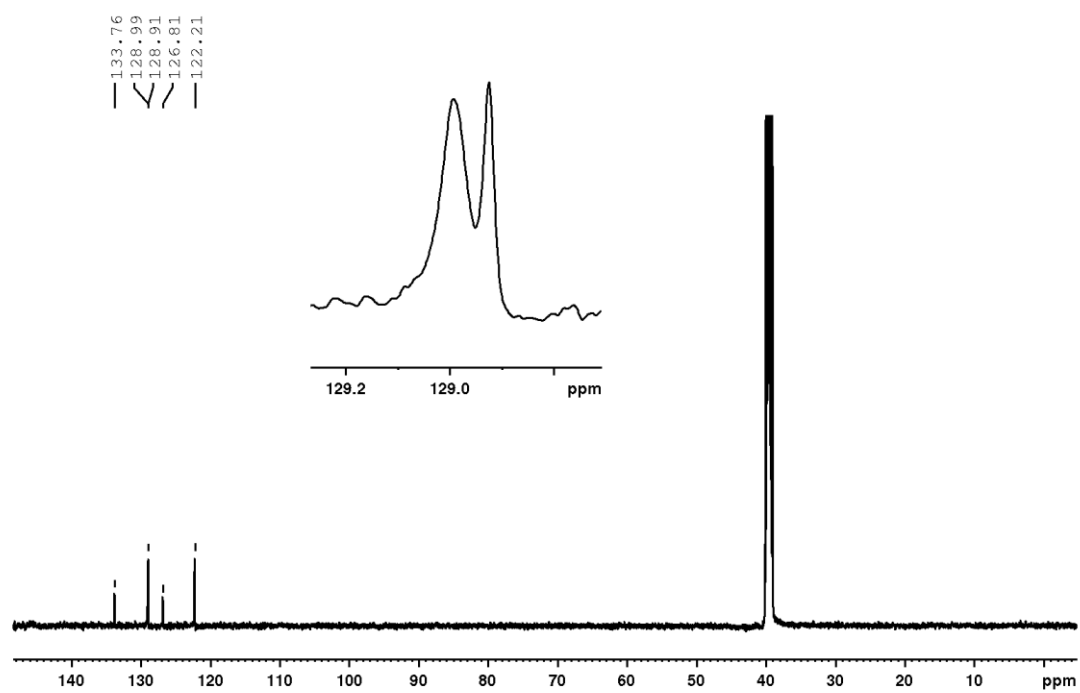

**Figure S18.**  $^{13}\text{C}\{^1\text{H}\}$  NMR spectrum of  $(\text{BF}_3\text{K})_4\text{-Per}$  in  $\text{DMSO-}d_6$  at 125 MHz.

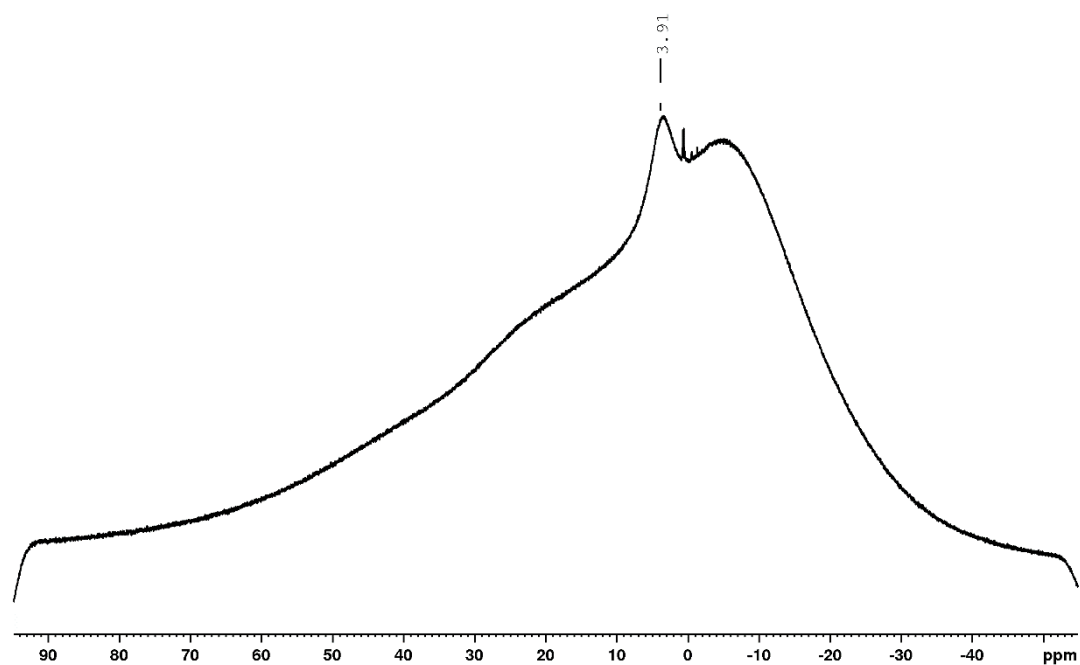

**Figure S19.**  $^{11}\text{B}\{^1\text{H}\}$  NMR spectrum of  $(\text{BF}_3\text{K})_4\text{-Per}$  in  $\text{DMSO-}d_6$  at 160 MHz.

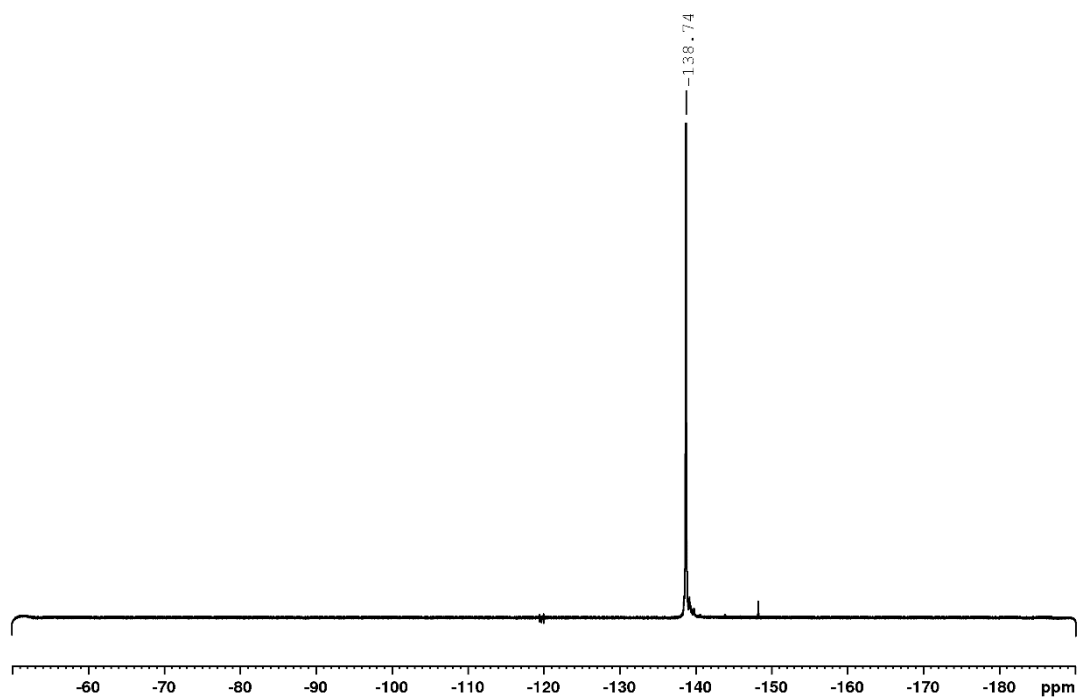

**Figure S20.**  $^{19}\text{F}\{^1\text{H}\}$  NMR spectrum of  $(\text{BF}_3\text{K})_4\text{-Per}$  in  $\text{DMSO-}d_6$  at 470 MHz.

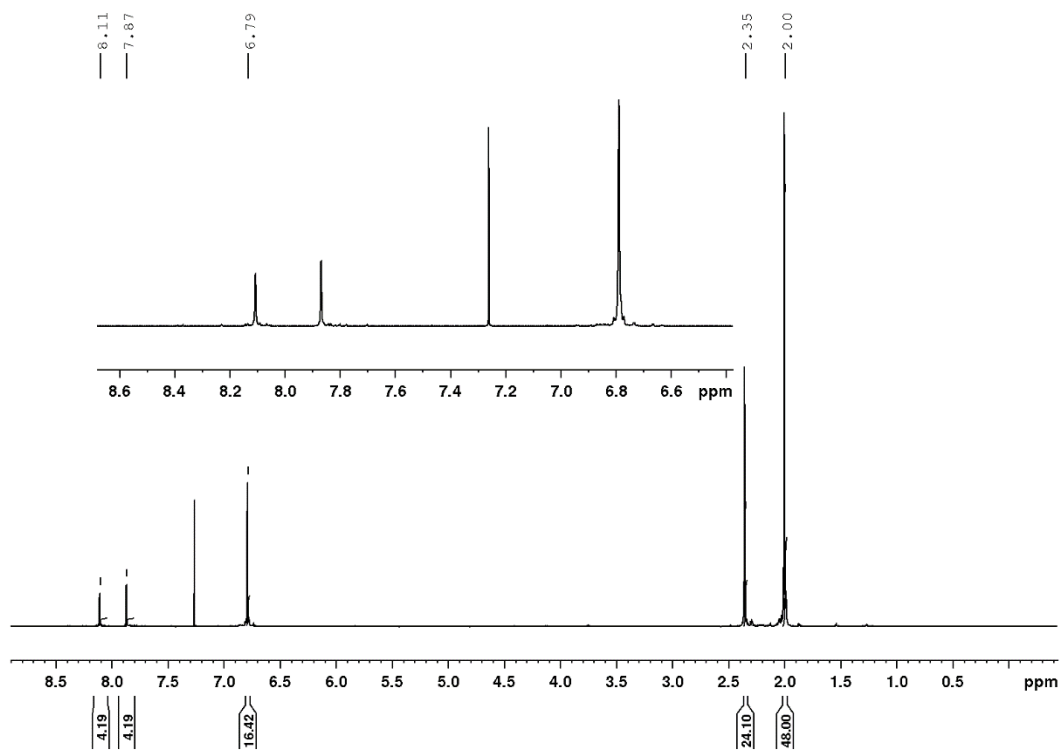

**Figure S21.**  $^1\text{H}$  NMR spectrum of  $(\text{Bmes}_2)_4\text{-Per}$  in  $\text{CDCl}_3$  at 500 MHz.

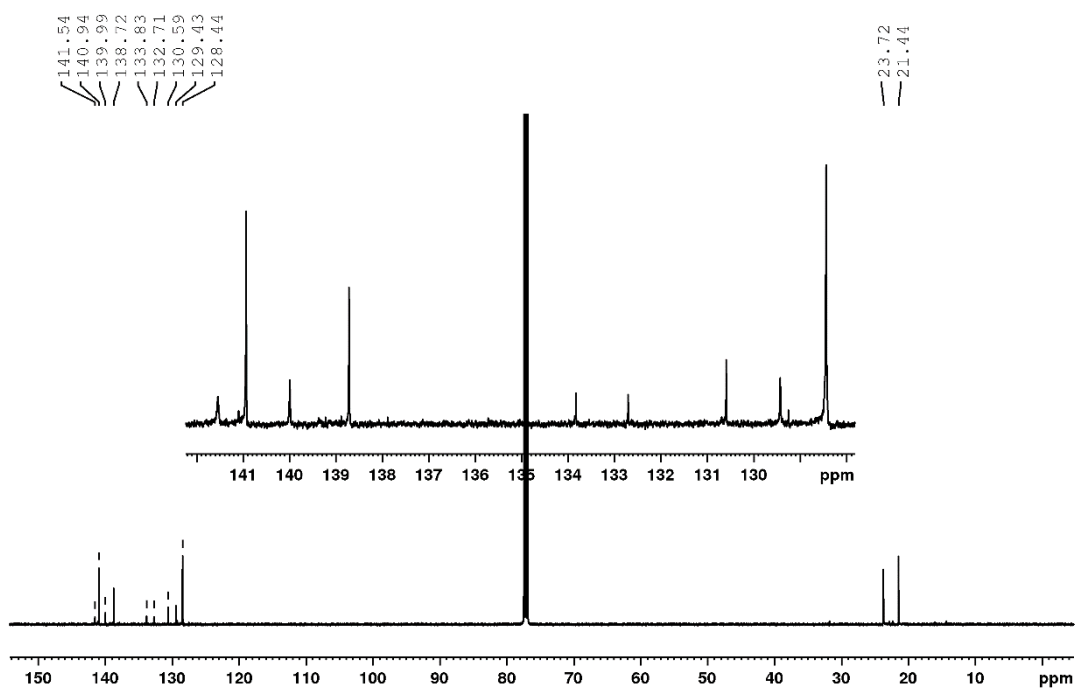

**Figure S22.**  $^{13}\text{C}\{^1\text{H}\}$  NMR spectrum of **(Bmes<sub>2</sub>)<sub>4</sub>-Per** in  $\text{CDCl}_3$  at 125 MHz.

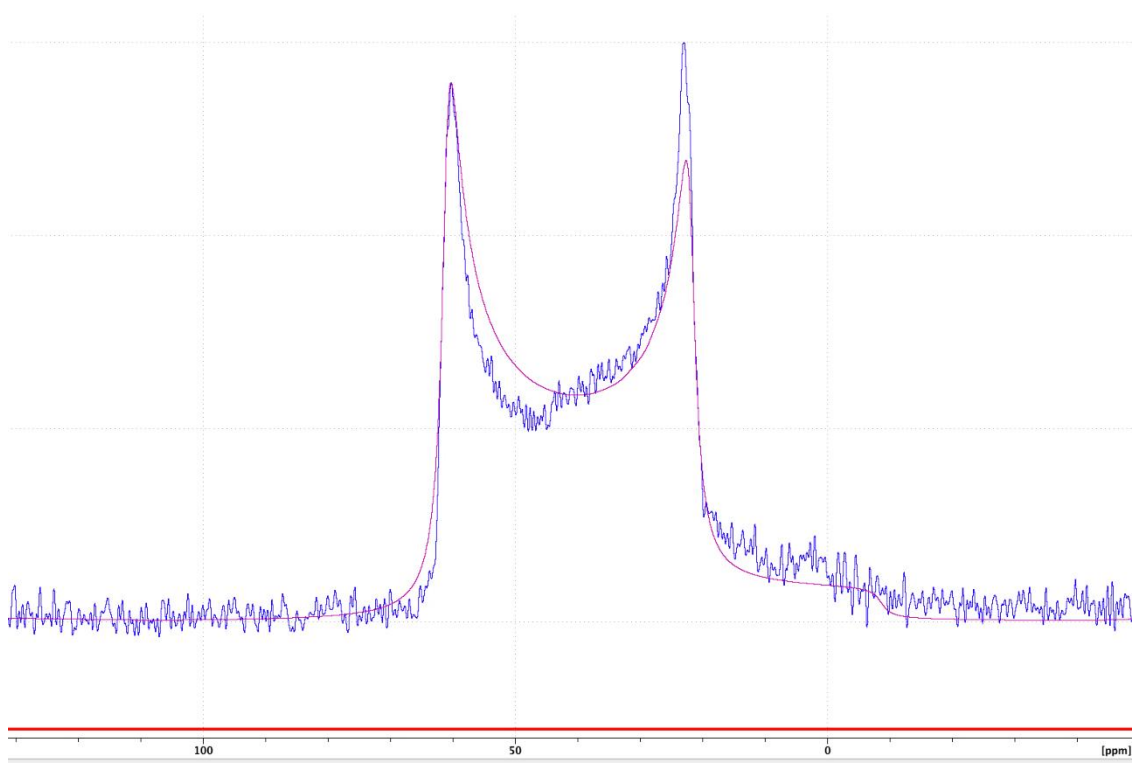

**Figure S23.** Observed (blue) and simulated (red) solid state  $^{11}\text{B}\{^1\text{H}\}$  NMR spectrum of **(Bmes<sub>2</sub>)<sub>4</sub>-Per** at 128 MHz. The isotropic chemical shift ( $\delta_{\text{iso}}$ ) is 72.7 ppm, quadrupolar coupling constant  $C_Q = 4.63$  MHz, quadrupolar asymmetry parameter  $\eta_{\text{Quad}} = 0.0$ .

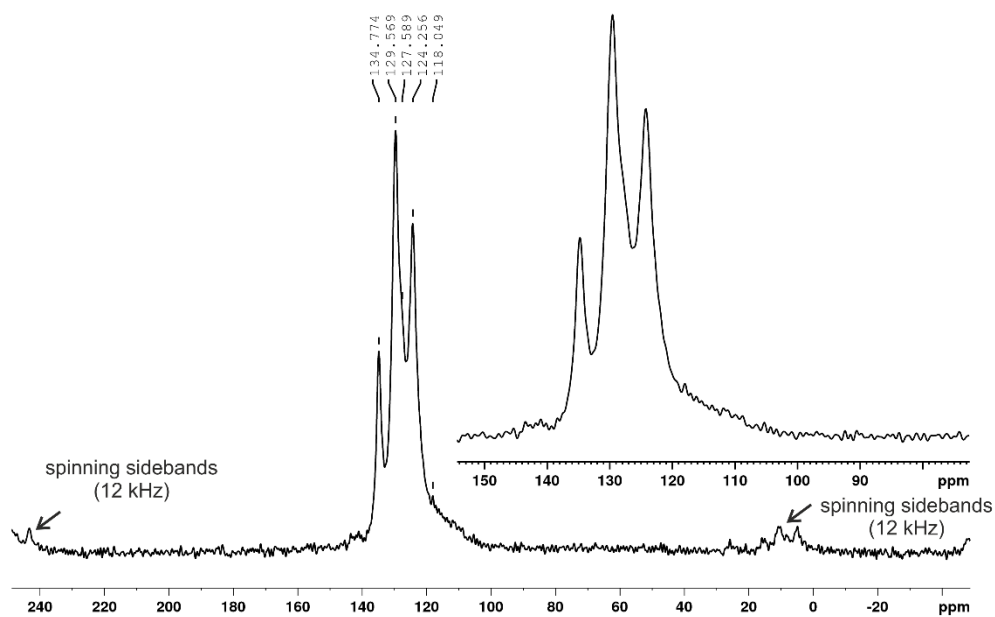

**Figure S24.** Solid state  $^{13}\text{C}\{^1\text{H}\}$ -CP spectrum of  $(\text{Br})_4\text{-Per}$  at 100 MHz. Measured at 12 kHz rotation.

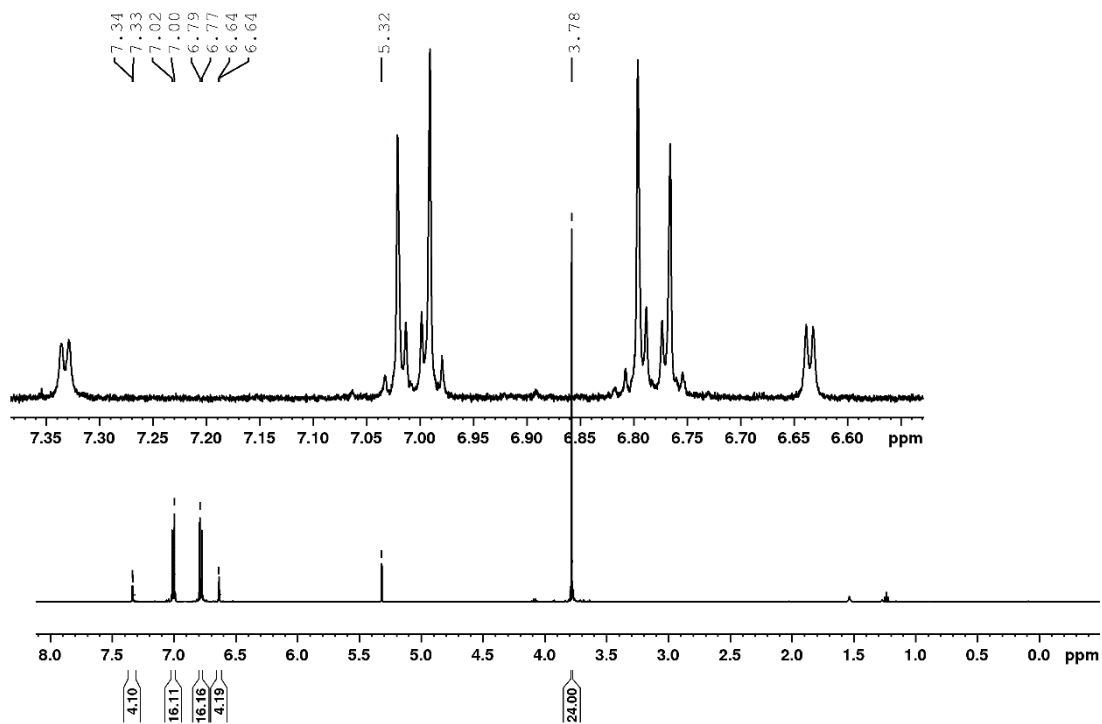

**Figure S25.**  $^1\text{H}$  NMR spectrum of  $(\text{DPA})_4\text{-Per}$  in  $\text{CD}_2\text{Cl}_2$  at 500 MHz.

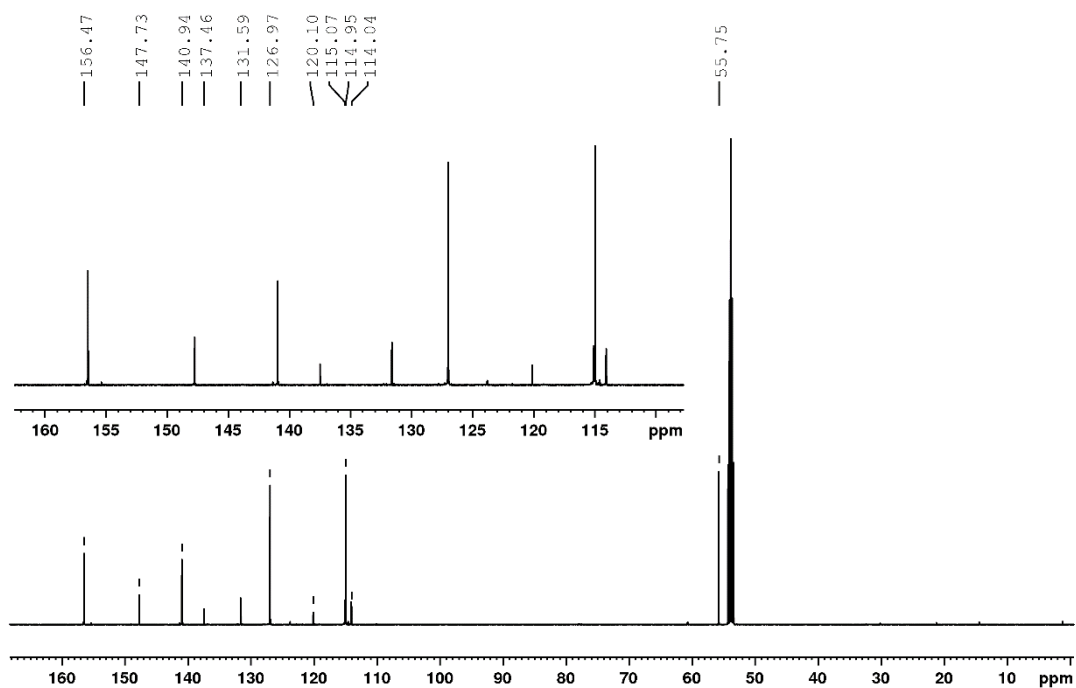

**Figure S26.**  $^{13}\text{C}\{^1\text{H}\}$  NMR spectrum of **(DPA)<sub>4</sub>-Per** in  $\text{CD}_2\text{Cl}_2$  at 125 MHz.

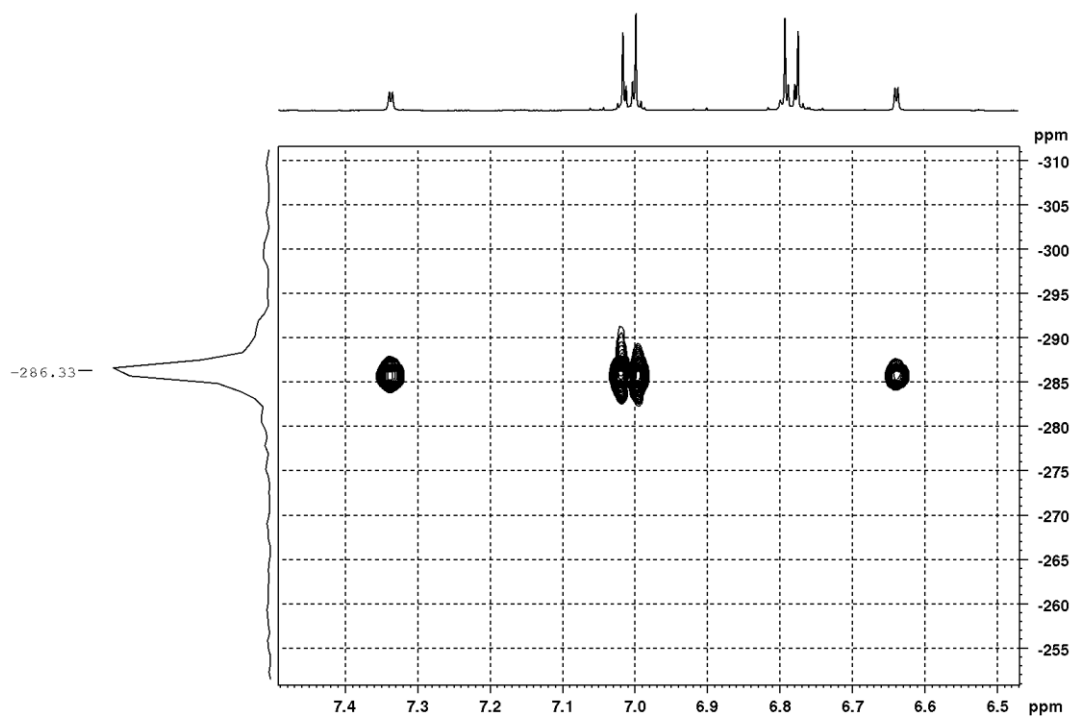

**Figure S27.**  $^{15}\text{N}$ ,  $^1\text{H}$  HMBC NMR spectrum of **(DPA)<sub>4</sub>-Per** in  $\text{CD}_2\text{Cl}_2$  at 500 MHz.

## Single-crystal X-ray diffraction

**Table S1:** Single-crystal X-ray diffraction data and structure refinement of **(DPA)<sub>4</sub>-Per**.

| Compound                                                   | 4N-Per                                                        |
|------------------------------------------------------------|---------------------------------------------------------------|
| CCDC                                                       | 1881912                                                       |
| Formula                                                    | C <sub>76</sub> H <sub>64</sub> N <sub>4</sub> O <sub>8</sub> |
| $\rho_x$ /g cm <sup>-3</sup>                               | 1.305                                                         |
| <i>F</i> (000)                                             | 1224                                                          |
| Crystal size/mm <sup>3</sup>                               | 0.132×0.302×0.39                                              |
| Crystal color, habit                                       | orange plate                                                  |
| $\mu$ /mm <sup>-1</sup>                                    | 0.085                                                         |
| <i>M<sub>r</sub></i> /g·mol <sup>-1</sup>                  | 1161.31                                                       |
| <i>T</i> /K                                                | 100                                                           |
| $\lambda$ /Å, radiation                                    | 0.71073, MoK $\alpha$                                         |
| Crystal system                                             | monoclinic                                                    |
| Space group                                                | <i>P</i> 2 <sub>1</sub> / <i>n</i>                            |
| <i>a</i> /Å                                                | 14.025(7)                                                     |
| <i>b</i> /Å                                                | 11.576(7)                                                     |
| <i>c</i> /Å                                                | 18.285(9)                                                     |
| $\alpha$ /°                                                | 90                                                            |
| $\beta$ /°                                                 | 95.45(2)                                                      |
| $\gamma$ /°                                                | 90                                                            |
| <i>V</i> /Å <sup>3</sup>                                   | 2955(3)                                                       |
| <i>Z</i>                                                   | 2                                                             |
| $\theta_{max}$ /°                                          | 26.511                                                        |
| Reflections collected                                      | 23828                                                         |
| Unique refls.                                              | 6104                                                          |
| Parameters                                                 | 401                                                           |
| GooF on <i>F</i> <sup>2</sup>                              | 1.016                                                         |
| <i>R</i> <sub>1</sub> [ <i>I</i> >2 $\sigma$ ( <i>I</i> )] | 0.0470                                                        |
| <i>wR</i> <sub>2</sub> (all data)                          | 0.1182                                                        |
| Max./min. residual electron density/e·Å <sup>-3</sup>      | 0.271/-0.214                                                  |



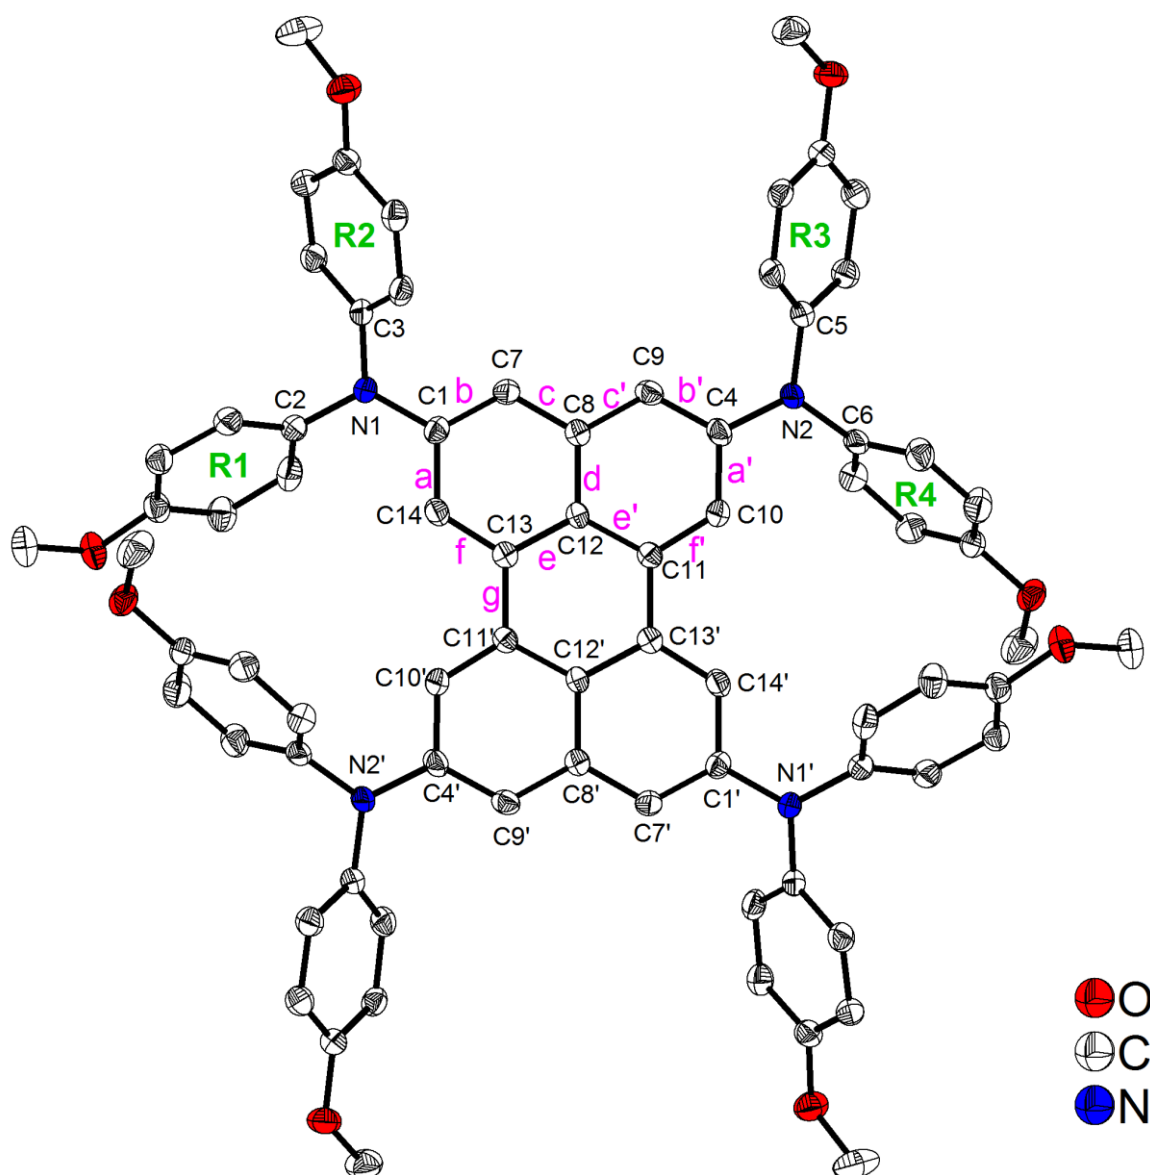

**Figure S28.** Solid state molecular structure of **(DPA)<sub>4</sub>-Per** from single-crystal X-ray diffraction at 100 K. Atomic displacement ellipsoids are drawn at the 50% probability level, and hydrogen atoms are omitted for clarity. Terminal aryl rings bonded to nitrogen are labelled R1 and R2 if bonded to N1 and R3 and R4 if bonded to N2, respectively.

**Table S2.** Selected bond lengths (Å) and angles (°) of compound **(DPA)<sub>4</sub>-Per**. Bonds are labelled according to the scheme in Figure S28.

|                        | <b>(DPA)<sub>4</sub>-Per<br/>this study</b> | <b><i>β</i>-perylene<sup>[1]</sup></b> |
|------------------------|---------------------------------------------|----------------------------------------|
| a, a'                  | 1.412(3), 1.412(3)                          | 1.407(1), 1.409(1)                     |
| b, b'                  | 1.372(3), 1.378(3)                          | 1.370(1), 1.371(1)                     |
| c, c'                  | 1.412(3), 1.416(3)                          | 1.417(1), 1.418(1)                     |
| d                      | 1.426(3)                                    | 1.429(1)                               |
| e, e'                  | 1.424(3), 1.422(2)                          | 1.430(1), 1.429(1)                     |
| f, f'                  | 1.380(3), 1.371(3)                          | 1.389(1), 1.387(1)                     |
| g                      | 1.479(2)                                    | 1.474(1)                               |
| N1–C1                  | 1.406(2)                                    |                                        |
| N1–C2                  | 1.429(2)                                    |                                        |
| N1–C3                  | 1.422(2)                                    |                                        |
| N2–C4                  | 1.399(2)                                    |                                        |
| N2–C5                  | 1.413(2)                                    |                                        |
| N2–C6                  | 1.432(2)                                    |                                        |
| ∠ N1C <sub>3</sub> -R1 | 42.90(8)                                    |                                        |
| ∠ N1C <sub>3</sub> -R2 | 43.99(9)                                    |                                        |
| ∠ N2C <sub>3</sub> -R3 | 44.15(7)                                    |                                        |
| ∠ N2C <sub>3</sub> -R4 | 66.00(9)                                    |                                        |
| Sum ∠ CN1C             | 359.8(2)                                    |                                        |
| Sum ∠ CN2C             | 359.2(2)                                    |                                        |

**Table S3.** Intra- and intermolecular interaction distances (Å) of compound **(DPA)<sub>4</sub>-Per** at 100 K. Aryl rings are labelled according to the scheme in Figure S28. '(m)' denotes that the methoxy group of the respective aryl ring is involved in the interaction.

|                         | H...O/C/π  | C...O/C/π  | Aryl / (m)...Aryl / (m)           |
|-------------------------|------------|------------|-----------------------------------|
| Intramolecular contact  |            |            |                                   |
| C20-H20C...O4'          | 2.5064(18) | 3.246(3)   | R1(m)...R4'(m),<br>R1'(m)...R4(m) |
| Intermolecular contacts |            |            |                                   |
| C24-H24...π(R3)         | 2.8207(14) | 2.8419(13) | R2...π(R3)                        |
| C32-H32A...O4           | 2.5422(17) | 3.287(3)   | R3(m)...R4(m)                     |
| C33-H33...O2            | 2.6568(16) | 3.378(3)   | R4(m)...R2                        |
| C16-H16...C29           | 2.714(2)   | 3.395(3)   | R1...R3                           |
| C32-H32B...C8           | 2.6230(19) | 3.445(3)   | R3(m)...perylene                  |
| C30-H30...O2            | 2.6986(17) | 3.499(3)   | R3...R2(m)                        |
| C38-H38B...C13          | 2.675(2)   | 3.540(3)   | R4(m)...perylene                  |
| C32-H32C...O1           | 2.6826(17) | 3.616(3)   | R3(m)...R1(m)                     |
| C21-H21...C9            | 2.773(2)   | 3.630(3)   | R2...perylene                     |
| C16-H16...O3            | 2.7954(17) | 3.676(3)   | R1...R3(m)                        |
| C38-H38B...C14          | 2.745(2)   | 3.685(3)   | R4(m)...perylene                  |
| C7-H7...π(R1)           | 2.800(2)   | 3.695(3)   | perylene...π(R1)                  |
| C35...O3                |            | 3.175(3)   | R3...R4(m)                        |
| C20...O2                |            | 3.526(3)   | R1(m)...R2(m)                     |

Note: For the intramolecular contact the notation of the aryl rings distinguishes between the inversion symmetric rings, i.e. R1 and R1' as well as R4 and R4', respectively.

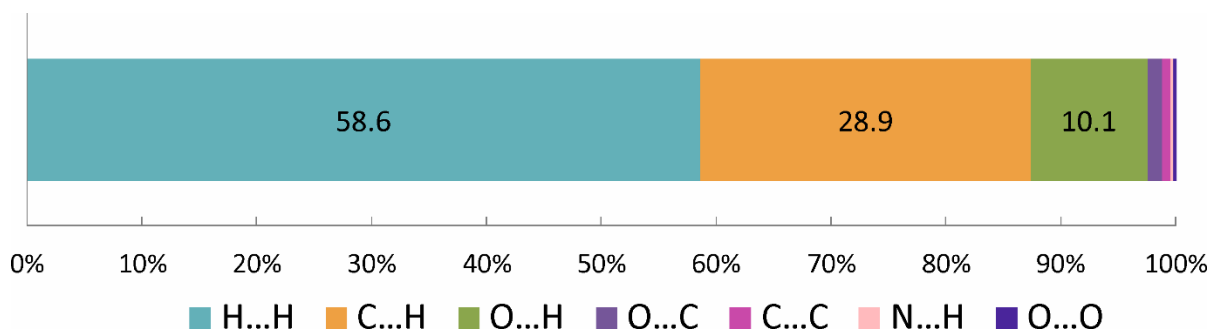

**Figure S29.** Percentage contributions to the Hirshfeld surface area for the various close intermolecular contacts in  $(\text{DPA})_4\text{-Per}$  at 100 K.

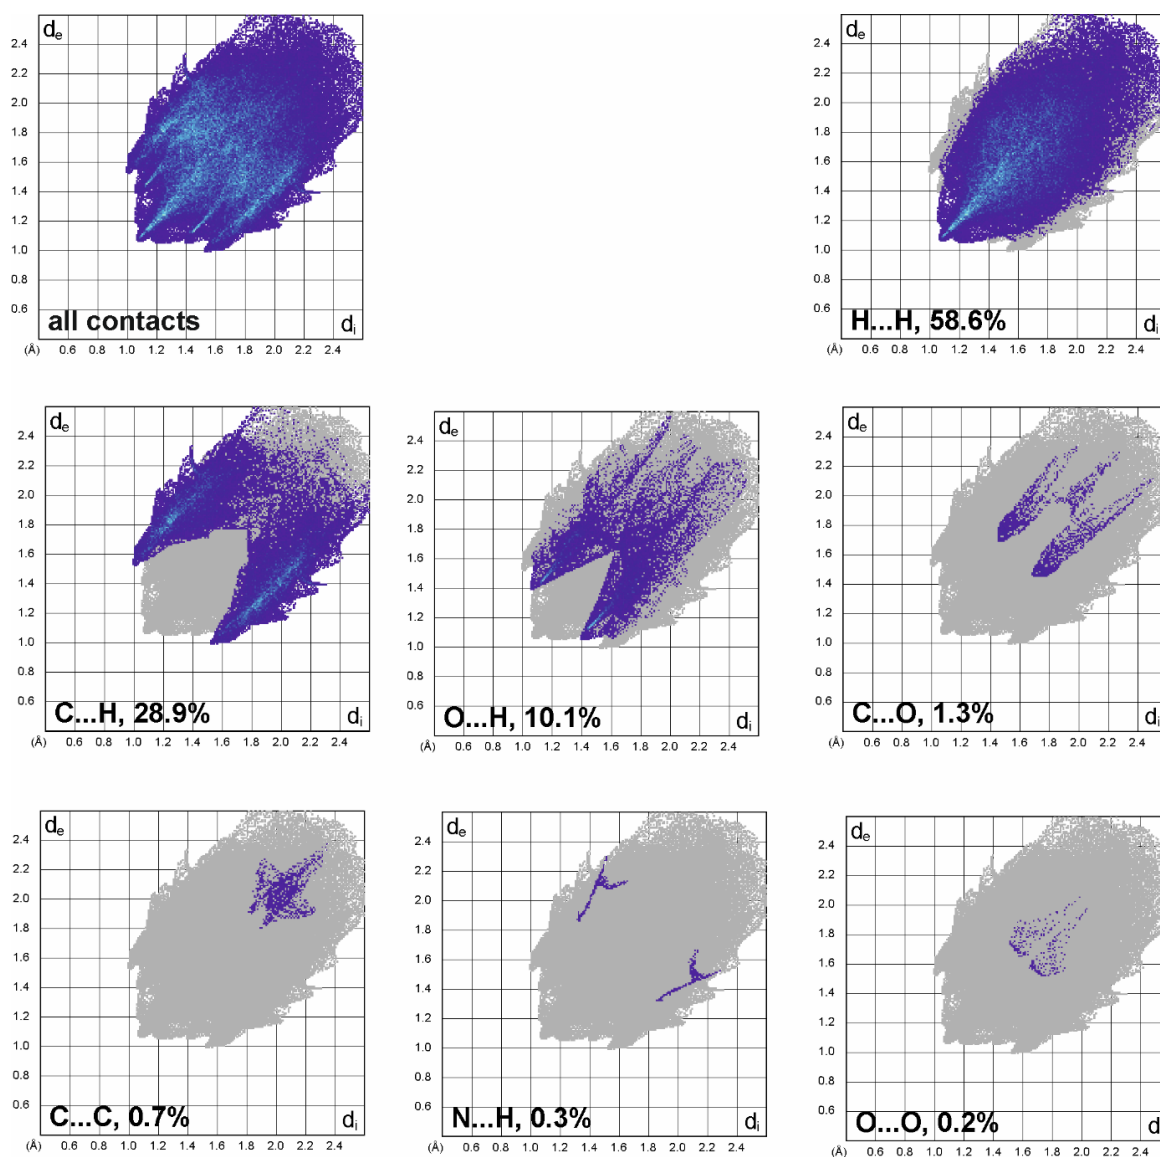

**Figure S30.** Two-dimensional fingerprint plots of  $(\text{DPA})_4\text{-Per}$  calculated from the Hirshfeld surface at 100 K. The top left figure shows the complete fingerprint plot, while the other plots indicate the contributions of the individual intermolecular interactions within the grey area of all contributions.

## TD-DFT Results

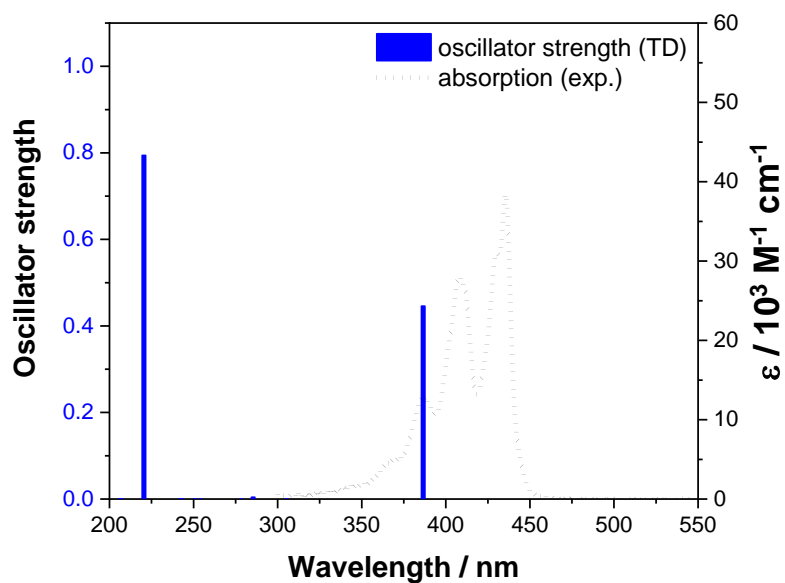

**Figure S31.** TD-DFT calculated singlet electronic transitions of **perylene** in the gas phase using CAM-B3LYP/6-31+G (d,p) and the experimental absorption in toluene.

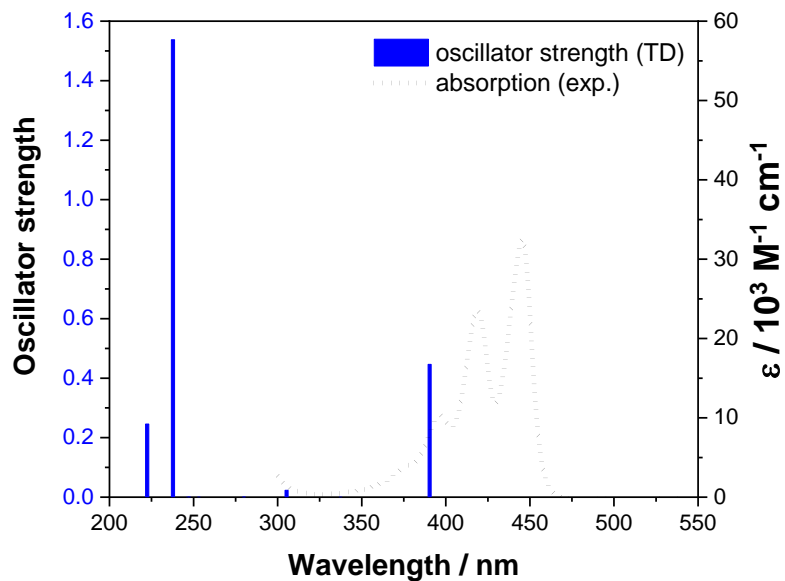

**Figure S32.** TD-DFT calculated singlet electronic transitions of **(Bpin<sub>4</sub>)-Per** in the gas phase using CAM-B3LYP/6-31+G (d,p) and the experimental absorption in toluene.

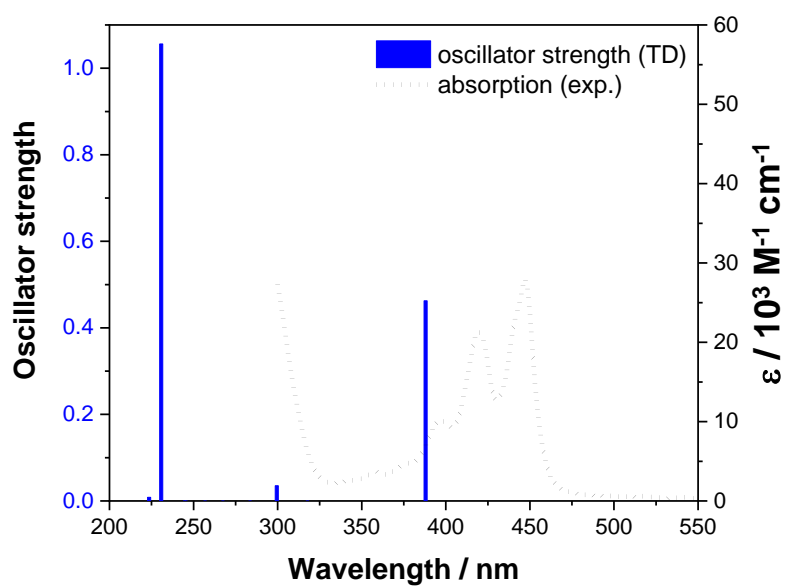

**Figure S33.** TD-DFT calculated singlet electronic transitions of  $(\text{Br})_4\text{-Per}$  in the gas phase using CAM-B3LYP/6-31+G (d,p) and the experimental absorption in toluene.

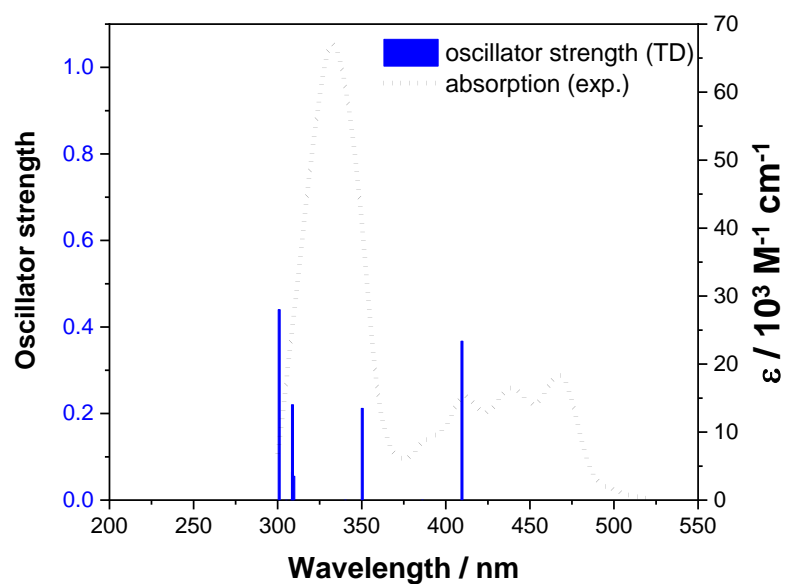

**Figure S34.** TD-DFT calculated singlet electronic transitions of  $(\text{Bmes}_2)_4\text{-Per}$  in the gas phase using CAM-B3LYP/6-31+G (d,p) and the experimental absorption in toluene.

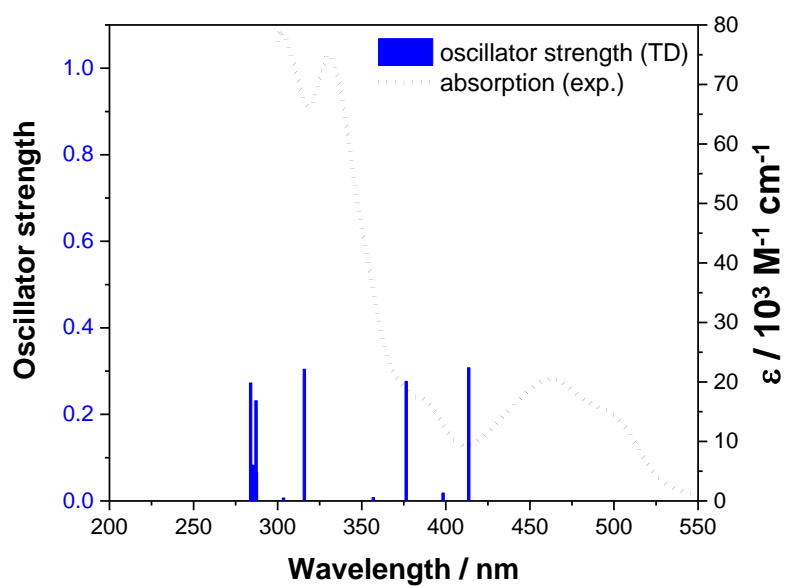

**Figure S35.** TD-DFT calculated singlet electronic transitions of **(DPA)<sub>4</sub>-Per** in the gas phase using CAM-B3LYP/6-31+G (d,p) and the experimental absorption in toluene.

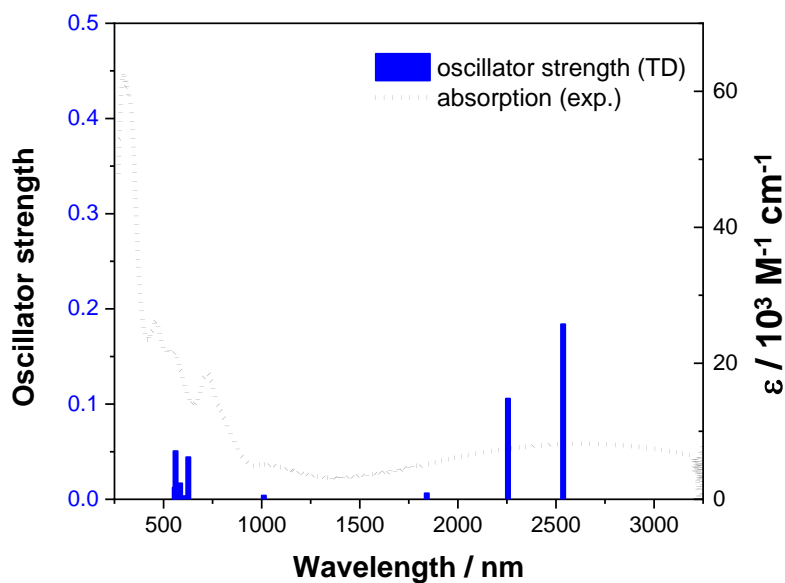

**Figure S36.** TD-DFT calculated singlet electronic transitions of **(DPA)<sub>4</sub>-Per<sup>+</sup>** in dichloromethane using ublyp/svp and the experimental absorption in dichloromethane.

**Table S4.** Lowest energy singlet electronic transitions of **(DPA)<sub>4</sub>-Per<sup>+</sup>** (TD-DFT) using ublyp with 35% exact exchange admixture, a SVP basis set and a polarizable continuum model accounting for solvent effects (CH<sub>2</sub>Cl<sub>2</sub>).

| <b>FC-S<sub>n</sub></b> | <b>E [eV] (E [nm])</b> | <b>f</b> | <b>Configuration (major contributions &gt; 10%)</b>                                                                                          |
|-------------------------|------------------------|----------|----------------------------------------------------------------------------------------------------------------------------------------------|
| <b>S<sub>1</sub></b>    | 0.49 (2536)            | 0.184    | $\beta$ -H $\rightarrow$ $\beta$ -L (89%)                                                                                                    |
| <b>S<sub>2</sub></b>    | 0.55 (2256)            | 0.106    | $\beta$ -H-1 $\rightarrow$ $\beta$ -L (82%)                                                                                                  |
| <b>S<sub>3</sub></b>    | 0.67 (1842)            | 0.006    | $\beta$ -H-2 $\rightarrow$ $\beta$ -L (87%)                                                                                                  |
| <b>S<sub>4</sub></b>    | 1.23 (1011)            | 0.004    | $\beta$ -H-3 $\rightarrow$ $\beta$ -L (97%)                                                                                                  |
| <b>S<sub>5</sub></b>    | 1.98 (626)             | 0.044    | $\alpha$ -H-1 $\rightarrow$ $\alpha$ -L (63%), $\beta$ -H-8 $\rightarrow$ $\beta$ -L (19%),<br>$\alpha$ -H-4 $\rightarrow$ $\alpha$ -L (19%) |



## Orbital Depictions

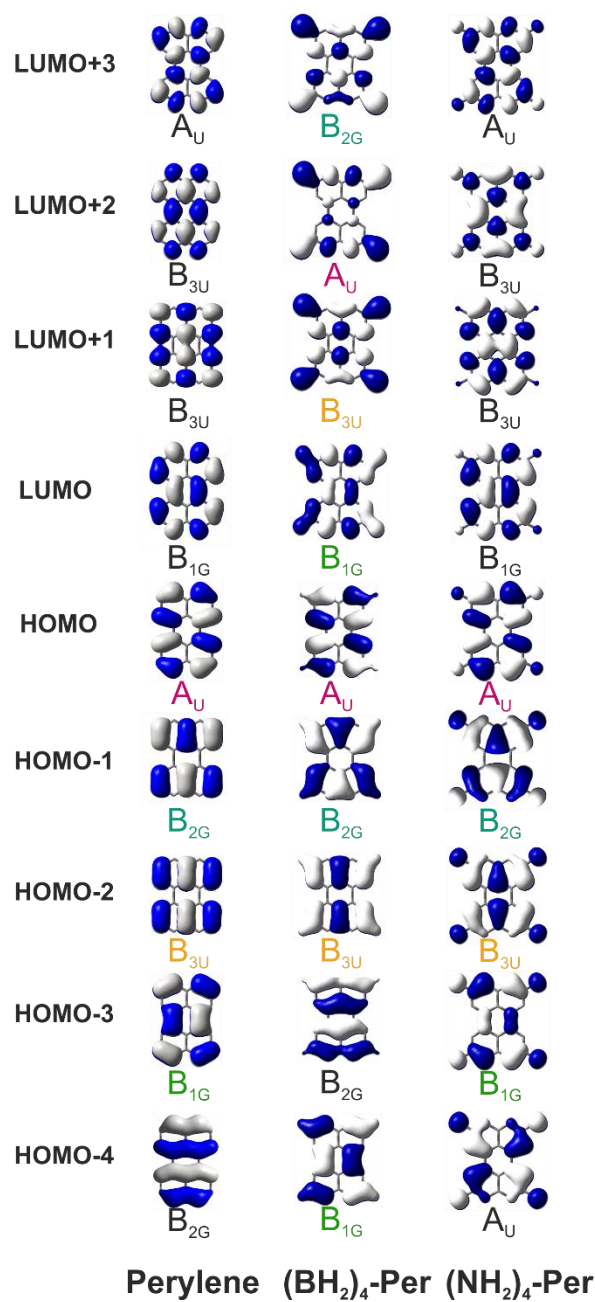

**Figure S37.** Depiction of the orbitals LUMO+3 to HOMO-4 of the model compounds  $(BH_2)_4$ -Per and  $(NH_2)_4$ -Per.

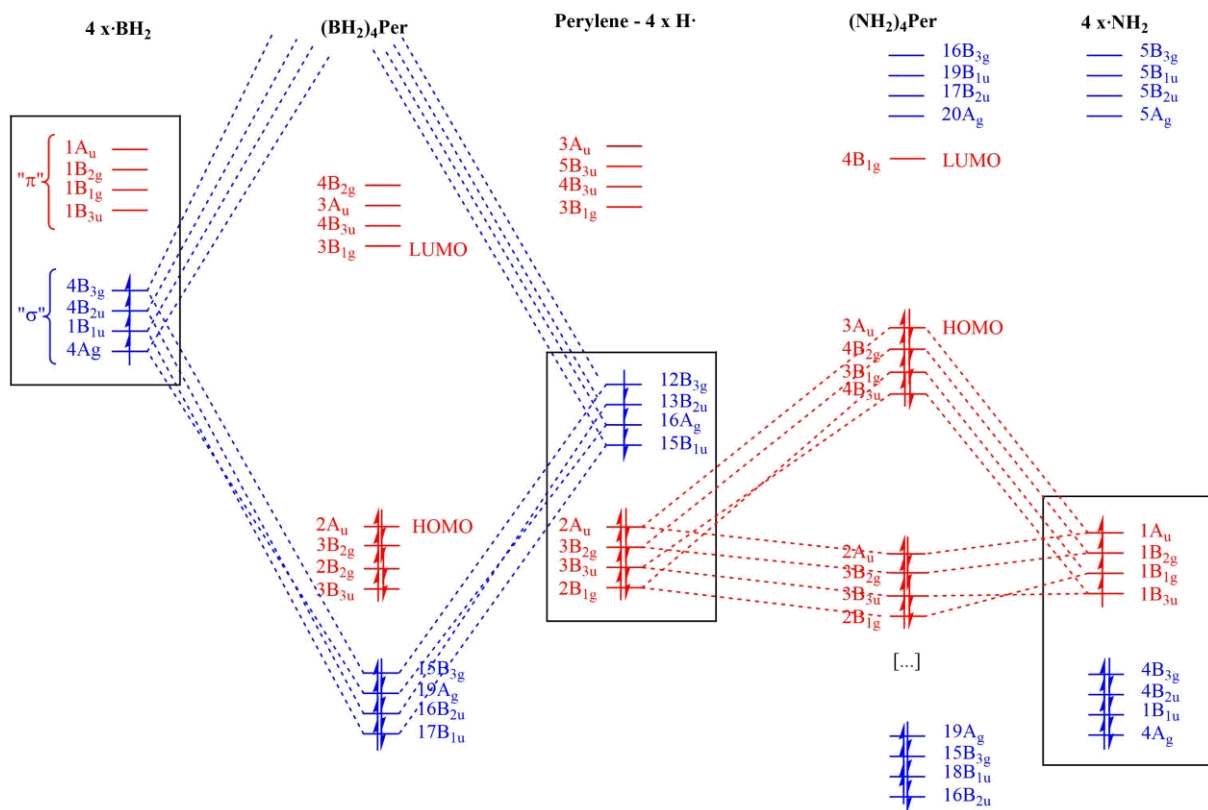

**Figure S38.** Schematic representation of the fragmentation of the model compounds  $(\text{BH}_2)_4\text{-Per}$  and  $(\text{NH}_2)_4\text{-Per}$ .

## Cartesian Coordinates

Compound Perylene (DFT B3LYP/6-31+G(d,p), S<sub>0</sub>)

Total energy: -482867.30 kcal mol<sup>-1</sup>

Dipole moment: 0 D

| Symbol | X/Å       | Y/Å       | Z/Å       |
|--------|-----------|-----------|-----------|
| C      | -2.881740 | 2.421287  | 0.000006  |
| C      | -1.476137 | 2.426109  | 0.000000  |
| C      | -0.737075 | 1.248466  | 0.000001  |
| C      | -1.437288 | -0.000014 | 0.000003  |
| C      | -2.871146 | 0.000001  | 0.000005  |
| C      | -3.571300 | 1.231791  | 0.000009  |
| C      | -0.737085 | -1.248494 | -0.000002 |
| C      | -1.476195 | -2.426128 | -0.000017 |
| C      | 2.881794  | -2.421270 | 0.000013  |
| C      | -3.571327 | -1.231757 | -0.000001 |
| C      | 0.737074  | 1.248462  | -0.000001 |
| C      | 1.437291  | -0.000012 | -0.000002 |
| C      | 0.737083  | -1.248499 | 0.000005  |
| C      | 2.871147  | 0.000008  | -0.000006 |
| C      | 3.571330  | -1.231759 | -0.000000 |
| C      | -2.881789 | -2.421273 | -0.000014 |
| C      | 1.476194  | -2.426126 | 0.000018  |
| C      | 1.476138  | 2.426109  | 0.000001  |
| C      | 2.881733  | 2.421290  | -0.000006 |
| C      | 3.571298  | 1.231790  | -0.000010 |
| H      | -3.416808 | 3.365822  | 0.000007  |
| H      | -0.971928 | 3.384539  | -0.000003 |
| H      | -4.657190 | 1.216550  | 0.000013  |
| H      | -0.972024 | -3.384570 | -0.000029 |
| H      | 3.416892  | -3.365789 | 0.000020  |
| H      | -4.657217 | -1.216503 | 0.000001  |
| H      | 4.657220  | -1.216497 | -0.000004 |
| H      | -3.416894 | -3.365788 | -0.000025 |
| H      | 0.972032  | -3.384573 | 0.000032  |
| H      | 0.971923  | 3.384537  | 0.000006  |
| H      | 3.416809  | 3.365821  | -0.000006 |
| H      | 4.657188  | 1.216556  | -0.000016 |

**Compound (Bpin)<sub>4</sub>-Per** (DFT B3LYP/6-31+G(d,p), S<sub>0</sub>)Total energy: -1513850 kcal mol<sup>-1</sup>

Dipole moment: 0.0015 D

| Symbol | X/Å         | Y/Å         | Z/Å         |
|--------|-------------|-------------|-------------|
| C      | -2.43893700 | -2.89298300 | -0.01232800 |
| C      | -2.42342000 | -1.47737000 | -0.00775800 |
| C      | -1.24912900 | -0.73765400 | -0.00403400 |
| C      | 0.00012200  | -1.43625800 | -0.00733700 |
| C      | 0.00010300  | -2.87013000 | -0.01126400 |
| C      | -1.23100200 | -3.56784800 | -0.01331100 |
| C      | 1.24938200  | -0.73764500 | -0.00665100 |
| C      | 2.42366100  | -1.47739700 | -0.00651400 |
| C      | 2.43911100  | 2.89304100  | -0.00171600 |
| C      | 1.23119600  | -3.56786200 | -0.01261200 |
| C      | -1.24912900 | 0.73761200  | 0.00248400  |
| C      | 0.00011400  | 1.43623700  | 0.00185200  |
| C      | 1.24937500  | 0.73765200  | -0.00430500 |
| C      | 0.00008700  | 2.87010200  | 0.00782300  |
| C      | 1.23116600  | 3.56785400  | 0.00524900  |
| C      | 2.43914100  | -2.89302500 | -0.00927600 |
| C      | 2.42364400  | 1.47741800  | -0.00632800 |
| C      | -2.42341200 | 1.47730400  | 0.01068200  |
| C      | -2.43893800 | 2.89291300  | 0.01641500  |
| C      | -1.23101600 | 3.56779800  | 0.01428100  |
| H      | -3.38235900 | -0.97342200 | -0.00828600 |
| H      | -1.21587000 | -4.65421100 | -0.01516200 |
| H      | 3.38260800  | -0.97347100 | -0.00329900 |
| H      | 1.21605000  | -4.65422000 | -0.01649600 |
| H      | 1.21601100  | 4.65421500  | 0.00833600  |
| H      | 3.38259000  | 0.97350300  | -0.01127900 |
| H      | -3.38233500 | 0.97333800  | 0.01410000  |
| H      | -1.21588800 | 4.65415900  | 0.01748700  |
| C      | -5.26452800 | 5.37989500  | -0.13898500 |
| C      | -6.01780600 | 4.04559300  | 0.21397900  |
| O      | -3.87778400 | 5.02889800  | 0.12052500  |
| O      | -5.00570400 | 3.03925900  | -0.06112300 |
| C      | -5.63478200 | 6.57688200  | 0.72749500  |
| H      | -5.04856500 | 7.44726200  | 0.42106000  |
| H      | -6.69522500 | 6.82320200  | 0.61302400  |
| H      | -5.43113300 | 6.38581700  | 1.78185300  |
| C      | -5.35471400 | 5.74706300  | -1.62290900 |
| H      | -6.35688300 | 6.09192800  | -1.89235900 |
| H      | -4.64367900 | 6.55031700  | -1.83125100 |
| H      | -5.09736600 | 4.89344000  | -2.25539600 |
| C      | -7.24312900 | 3.75128000  | -0.64196000 |
| H      | -7.68384300 | 2.79869800  | -0.33619700 |
| H      | -7.99928700 | 4.53266800  | -0.51562900 |
| H      | -6.98498500 | 3.68081400  | -1.69934100 |
| C      | -6.36392000 | 3.92462700  | 1.70076900  |
| H      | -7.17407200 | 4.60299100  | 1.98252600  |
| H      | -6.68212800 | 2.89957100  | 1.90614400  |
| H      | -5.49363600 | 4.14133400  | 2.32569500  |

|   |             |             |             |
|---|-------------|-------------|-------------|
| O | 5.00537400  | 3.03965700  | -0.09500800 |
| C | 5.26286700  | 5.38008500  | -0.18483800 |
| O | 3.87764800  | -5.03002100 | 0.07622500  |
| C | 5.26431800  | -5.37901200 | -0.18641500 |
| C | 6.01787900  | -4.04801200 | 0.17819600  |
| O | -5.00537400 | -3.03948400 | 0.07535600  |
| C | -6.01853800 | -4.04585600 | -0.19565900 |
| C | -5.26368500 | -5.38015700 | 0.15395500  |
| O | 3.87799300  | 5.02972200  | 0.08523100  |
| O | -3.87806400 | -5.02901000 | -0.11129200 |
| O | 5.00594100  | -3.03906400 | -0.08765400 |
| C | 6.01897500  | 4.04749900  | 0.16866300  |
| C | 6.37540700  | 3.93316300  | 1.65355100  |
| H | 6.69566500  | 2.90917600  | 1.86112000  |
| H | 7.18713600  | 4.61313000  | 1.92676700  |
| H | 5.50935700  | 4.15211400  | 2.28355800  |
| C | 7.23844800  | 3.74985000  | -0.69444400 |
| H | 7.99521900  | 4.53199100  | -0.57669600 |
| H | 7.68153500  | 2.79866400  | -0.38778600 |
| H | 6.97301100  | 3.67470400  | -1.74967700 |
| C | 5.63839200  | 6.58079400  | 0.67420400  |
| H | 6.69794900  | 6.82703800  | 0.55166100  |
| H | 5.04980300  | 7.44966900  | 0.36805000  |
| H | 5.44181700  | 6.39406000  | 1.73068500  |
| C | 6.36432300  | -3.94043800 | 1.66596000  |
| H | 7.17431300  | -4.62153400 | 1.94151600  |
| H | 6.68299000  | -2.91736800 | 1.88037600  |
| H | 5.49408700  | -4.16240700 | 2.28911100  |
| C | 5.63435400  | -6.58359800 | 0.66957500  |
| H | 5.04787300  | -7.45111500 | 0.35562500  |
| H | 6.69471500  | -6.82919900 | 0.55283500  |
| H | 5.43088400  | -6.40167100 | 1.72559200  |
| C | 7.24308600  | -3.74626000 | -0.67532400 |
| H | 7.68388400  | -2.79639200 | -0.36136900 |
| H | 7.99921800  | -4.52878600 | -0.55602100 |
| H | 6.98474400  | -3.66638700 | -1.73197200 |
| C | 5.35440700  | -5.73320100 | -1.67347900 |
| H | 6.35648300  | -6.07598700 | -1.94590400 |
| H | 4.64313100  | -6.53438400 | -1.88883900 |
| H | 5.09733400  | -4.87400300 | -2.29847600 |
| C | -5.63746600 | -6.57704100 | -0.71115500 |
| H | -5.04991900 | -7.44742400 | -0.40728800 |
| H | -6.69740400 | -6.82345300 | -0.59229300 |
| H | -5.43824500 | -6.38580500 | -1.76633200 |
| C | -6.37090800 | -3.92468400 | -1.68096100 |
| H | -7.18218800 | -4.60306700 | -1.95940800 |
| H | -6.69006100 | -2.89962200 | -1.88483600 |
| H | -5.50324700 | -4.14122300 | -2.30958200 |
| C | -7.24027900 | -3.75180200 | 0.66546700  |
| H | -7.68239900 | -2.79923100 | 0.36170300  |
| H | -7.99686200 | -4.53327000 | 0.54221100  |
| H | -6.97769200 | -3.68145900 | 1.72175900  |
| C | -5.34763900 | -5.74757200 | 1.63818400  |
| H | -6.34865300 | -6.09253400 | 1.91177500  |

|   |             |             |             |
|---|-------------|-------------|-------------|
| H | -4.63568400 | -6.55080500 | 1.84342900  |
| H | -5.08768400 | -4.89404000 | 2.26972500  |
| C | 5.34315300  | 5.74113200  | -1.67083200 |
| H | 4.63053200  | 6.54333900  | -1.87778000 |
| H | 6.34342900  | 6.08512100  | -1.94831400 |
| H | 5.08187700  | 4.88484200  | -2.29807600 |
| B | -3.78278400 | 3.66100100  | 0.02515400  |
| B | 3.78282800  | 3.66141400  | -0.00401100 |
| B | 3.78289500  | -3.66132800 | -0.00734300 |
| B | -3.78277300 | -3.66112800 | -0.01595900 |

**Compound (Br)<sub>4</sub>-Per (DFT B3LYP/6-31+G(d,p), S<sub>0</sub>)**

Total energy: -6936347.82 kcal mol<sup>-1</sup>

Dipole moment: 0 D

| Symbol | X/Å       | Y/Å       | Z/Å       |
|--------|-----------|-----------|-----------|
| C      | -2.870519 | -2.405753 | -0.000006 |
| C      | -1.467131 | -2.428014 | -0.000005 |
| C      | -0.736740 | -1.247265 | -0.000001 |
| C      | -1.434915 | 0.000002  | -0.000000 |
| C      | -2.866741 | -0.000001 | -0.000000 |
| C      | -3.574357 | -1.227674 | -0.000003 |
| C      | -0.736743 | 1.247272  | 0.000001  |
| C      | -1.467143 | 2.428017  | 0.000006  |
| C      | 2.870526  | 2.405754  | -0.000006 |
| C      | -3.574363 | 1.227667  | 0.000003  |
| C      | 0.736742  | -1.247264 | 0.000001  |
| C      | 1.434914  | 0.000004  | -0.000000 |
| C      | 0.736741  | 1.247273  | -0.000001 |
| C      | 2.866740  | 0.000003  | 0.000000  |
| C      | 3.574361  | 1.227673  | -0.000003 |
| C      | -2.870530 | 2.405750  | 0.000007  |
| C      | 1.467139  | 2.428019  | -0.000005 |
| C      | 1.467135  | -2.428012 | 0.000004  |
| C      | 2.870522  | -2.405749 | 0.000005  |
| C      | 3.574359  | -1.227669 | 0.000003  |
| H      | -0.976278 | -3.390972 | -0.000007 |
| H      | -4.657739 | -1.224680 | -0.000003 |
| H      | -0.976297 | 3.390978  | 0.000009  |
| H      | -4.657745 | 1.224669  | 0.000004  |
| H      | 4.657743  | 1.224676  | -0.000003 |
| H      | 0.976292  | 3.390979  | -0.000008 |
| H      | 0.976283  | -3.390971 | 0.000006  |
| H      | 4.657740  | -1.224674 | 0.000003  |
| Br     | 3.802752  | -4.070220 | 0.000009  |
| Br     | 3.802759  | 4.070223  | -0.000011 |

Br -3.802766 4.070218 0.000012  
Br -3.802746 -4.070226 -0.000010

**Compound (Bmes<sub>2</sub>)<sub>4</sub>-Per** (DFT B3LYP/6-31+G(d,p), S<sub>0</sub>)

Total energy: -2299118.34 kcal mol<sup>-1</sup>

Dipole moment: 0.00028 D

| Symbol | X/Å       | Y/Å       | Z/Å       |
|--------|-----------|-----------|-----------|
| C      | 2.447730  | 2.893775  | 0.017218  |
| C      | 2.418076  | 1.475385  | 0.013540  |
| C      | 1.244958  | 0.738065  | 0.007485  |
| C      | -0.001316 | 1.437479  | -0.000417 |
| C      | -0.002563 | 2.872403  | 0.000026  |
| C      | 1.232973  | 3.567376  | 0.017815  |
| C      | -1.246351 | 0.735853  | -0.008789 |
| C      | -2.420781 | 1.471105  | -0.014849 |
| C      | -2.447693 | -2.894699 | 0.016406  |
| C      | -1.239315 | 3.565179  | -0.017393 |
| C      | 1.246288  | -0.736701 | -0.008571 |
| C      | 0.001276  | -1.438348 | -0.000861 |
| C      | -1.245012 | -0.738936 | 0.006935  |
| C      | 0.002592  | -2.873284 | -0.000840 |
| C      | -1.232928 | -3.568278 | 0.016770  |
| C      | -2.452911 | 2.889449  | -0.017616 |
| C      | -2.418106 | -1.476296 | 0.012806  |
| C      | 2.420734  | -1.471914 | -0.014261 |
| C      | 2.452925  | -2.890249 | -0.017656 |
| C      | 1.239375  | -3.566031 | -0.018230 |
| H      | 3.373864  | 0.965004  | 0.008162  |
| H      | 1.216825  | 4.655292  | 0.025918  |
| H      | -3.375683 | 0.959048  | -0.010142 |
| H      | -1.225098 | 4.653121  | -0.024689 |
| H      | -1.216771 | -4.656193 | 0.024749  |
| H      | -3.373923 | -0.965954 | 0.007468  |
| H      | 3.375606  | -0.959827 | -0.008738 |
| H      | 1.225197  | -4.653978 | -0.025987 |
| B      | 3.826397  | -3.633003 | 0.019017  |
| B      | 3.819863  | 3.639082  | -0.019174 |
| B      | -3.826145 | 3.632678  | 0.018508  |
| B      | -3.819817 | -3.640015 | -0.019092 |
| C      | 5.056493  | 2.863514  | -0.607771 |
| C      | 6.237161  | 2.696481  | 0.157047  |
| C      | 5.002562  | 2.267613  | -1.894546 |
| C      | 7.299979  | 1.940050  | -0.349788 |
| C      | 6.093884  | 1.540831  | -2.377191 |
| C      | 7.250881  | 1.353954  | -1.615324 |
| H      | 8.189659  | 1.805788  | 0.261044  |
| H      | 6.039104  | 1.106467  | -3.374764 |
| C      | 3.921449  | 5.102863  | 0.537794  |
| C      | 4.477303  | 6.142156  | -0.252994 |
| C      | 3.468777  | 5.421869  | 1.842006  |

|   |           |           |           |
|---|-----------|-----------|-----------|
| C | 4.538959  | 7.445772  | 0.246404  |
| C | 3.576286  | 6.733190  | 2.319637  |
| C | 4.094002  | 7.764575  | 1.533609  |
| H | 4.955966  | 8.232420  | -0.380423 |
| H | 3.249142  | 6.953125  | 3.334758  |
| C | -3.929081 | 5.097092  | -0.536653 |
| C | -4.486511 | 6.134548  | 0.255268  |
| C | -3.476236 | 5.418401  | -1.840294 |
| C | -4.549687 | 7.438797  | -0.242469 |
| C | -3.585273 | 6.730133  | -2.316252 |
| C | -4.104641 | 7.759855  | -1.529015 |
| H | -4.967937 | 8.224091  | 0.385205  |
| H | -3.258050 | 6.951803  | -3.330986 |
| C | 5.061574  | -2.855193 | 0.607760  |
| C | 6.242131  | -2.686212 | -0.156769 |
| C | 5.006367  | -2.259397 | 1.894547  |
| C | 7.303652  | -1.928149 | 0.350386  |
| C | 6.096408  | -1.530917 | 2.377492  |
| C | 7.253325  | -1.342213 | 1.615932  |
| H | 8.193259  | -1.792449 | -0.260230 |
| H | 6.040694  | -1.096650 | 3.375055  |
| C | -5.056853 | -2.864621 | -0.607031 |
| C | -6.236844 | -2.697134 | 0.158679  |
| C | -5.003927 | -2.269343 | -1.894151 |
| C | -7.300088 | -1.940967 | -0.347692 |
| C | -6.095659 | -1.542887 | -2.376316 |
| C | -7.252054 | -1.355613 | -1.613597 |
| H | -8.189197 | -1.806337 | 0.263876  |
| H | -6.041690 | -1.109016 | -3.374144 |
| C | -3.921163 | -5.103656 | 0.538347  |
| C | -4.477863 | -6.143077 | -0.251595 |
| C | -3.467537 | -5.422326 | 1.842379  |
| C | -4.539401 | -7.446543 | 0.248320  |
| C | -3.574940 | -6.733419 | 2.320527  |
| C | -4.093460 | -7.765003 | 1.535219  |
| H | -4.957097 | -8.233310 | -0.377884 |
| H | -3.247093 | -6.953057 | 3.335496  |
| C | -5.062696 | 2.855403  | 0.604954  |
| C | -5.009446 | 2.257043  | 1.890619  |
| C | -6.243201 | 2.690106  | -0.160608 |
| C | -6.101119 | 1.529508  | 2.371431  |
| C | -7.306433 | 1.933145  | 0.344467  |
| C | -7.257993 | 1.344674  | 1.608949  |
| H | -6.046739 | 1.093060  | 3.368114  |
| H | -8.195943 | 1.800303  | -0.266934 |
| C | 3.930966  | -5.096636 | -0.537803 |
| C | 4.489019  | -6.134701 | 0.252972  |
| C | 3.479050  | -5.416619 | -1.842097 |
| C | 4.553542  | -7.438200 | -0.246462 |
| C | 3.589465  | -6.727653 | -2.319740 |
| C | 4.109359  | -7.757949 | -1.533660 |
| H | 4.972208  | -8.223953 | 0.380370  |
| H | 3.262895  | -6.948272 | -3.334904 |
| C | 6.379478  | 3.291919  | 1.542202  |



|   |           |           |           |
|---|-----------|-----------|-----------|
| H | 7.347214  | 3.024751  | 1.979165  |
| H | 6.304690  | 4.383725  | 1.523258  |
| H | 5.600410  | 2.931245  | 2.224135  |
| C | 3.794788  | 2.405537  | -2.800968 |
| H | 3.062552  | 1.610550  | -2.615055 |
| H | 3.269070  | 3.354083  | -2.662077 |
| H | 4.095640  | 2.339249  | -3.852236 |
| C | 8.411159  | 0.557559  | -2.159248 |
| H | 8.089546  | -0.439713 | -2.482552 |
| H | 8.859325  | 1.052570  | -3.030436 |
| H | 9.195996  | 0.431694  | -1.406465 |
| C | -5.003537 | -5.884220 | -1.648038 |
| H | -5.857191 | -5.199018 | -1.635413 |
| H | -4.243695 | -5.431697 | -2.295314 |
| H | -5.323338 | -6.819030 | -2.119781 |
| C | -2.898901 | -4.378247 | 2.784644  |
| H | -3.070528 | -4.671533 | 3.826142  |
| H | -1.817608 | -4.259227 | 2.647924  |
| H | -3.342382 | -3.389905 | 2.637688  |
| C | -4.157341 | -9.182600 | 2.049477  |
| H | -3.290764 | -9.764378 | 1.707010  |
| H | -4.159556 | -9.211294 | 3.144383  |
| H | -5.056102 | -9.698085 | 1.692306  |
| C | 2.900994  | 4.377989  | 2.784997  |
| H | 3.344834  | 3.389764  | 2.638297  |
| H | 3.072926  | 4.671813  | 3.826292  |
| H | 1.819695  | 4.258443  | 2.648785  |
| C | 4.158517  | 9.182361  | 2.047274  |
| H | 3.298331  | 9.767659  | 1.694887  |
| H | 4.149197  | 9.212019  | 3.142092  |
| H | 5.063339  | 9.693613  | 1.699320  |
| C | 5.001756  | 5.882890  | -1.649822 |
| H | 5.855112  | 5.197316  | -1.637821 |
| H | 4.241172  | 5.430605  | -2.296416 |
| H | 5.321564  | 6.817502  | -2.121950 |
| C | 3.798565  | -2.399242 | 2.800637  |
| H | 3.065000  | -1.605565 | 2.614356  |
| H | 3.274520  | -3.348719 | 2.661779  |
| H | 4.098985  | -2.332226 | 3.851982  |
| C | 8.412260  | -0.544101 | 2.160204  |
| H | 8.088889  | 0.452288  | 2.484469  |
| H | 8.861625  | -1.039034 | 3.030824  |
| H | 9.196641  | -0.416141 | 1.407301  |
| C | 6.385742  | -3.281256 | -1.541962 |
| H | 6.312920  | -4.373195 | -1.523158 |
| H | 5.606137  | -2.921894 | -2.223974 |
| H | 7.353066  | -3.012301 | -1.978743 |
| C | -5.011437 | 5.872714  | 1.651451  |
| H | -4.251663 | 5.417781  | 2.297095  |
| H | -5.330043 | 6.806653  | 2.125731  |
| H | -5.865802 | 5.188388  | 1.637674  |
| C | -2.906616 | 4.376451  | -2.784317 |
| H | -1.825078 | 4.258808  | -2.648300 |
| H | -3.348560 | 3.387246  | -2.638490 |

|   |           |           |           |
|---|-----------|-----------|-----------|
| H | -3.079183 | 4.670914  | -3.825328 |
| C | -4.169961 | 9.178231  | -2.040944 |
| H | -3.299589 | 9.757937  | -1.704611 |
| H | -4.18063  | 9.20837   | -3.135777 |
| H | -5.064926 | 9.694886  | -1.676094 |
| C | 5.013023  | -5.874336 | 1.649767  |
| H | 5.865929  | -5.188188 | 1.637506  |
| H | 4.252078  | -5.422217 | 2.296019  |
| H | 5.33343   | -6.80848  | 2.122421  |
| C | 4.176576  | -9.175585 | -2.047384 |
| H | 5.077229  | -9.688392 | -1.691101 |
| H | 3.31208   | -9.759655 | -1.703574 |
| H | 4.177539  | -9.204742 | -3.142275 |
| C | 2.909103  | -4.373927 | -2.785103 |
| H | 3.351469  | -3.384958 | -2.638914 |
| H | 3.080987  | -4.667783 | -3.826392 |
| H | 1.827693  | -4.256026 | -2.648374 |
| C | -3.796713 | -2.407591 | -2.801256 |
| H | -3.063431 | -1.613729 | -2.6147   |
| H | -3.27207  | -3.356948 | -2.663696 |
| H | -4.097905 | -2.339716 | -3.852319 |
| C | -6.37799  | -3.291646 | 1.54435   |
| H | -6.303295 | -4.38347  | 1.526095  |
| H | -5.598287 | -2.930547 | 2.225335  |
| H | -7.345309 | -3.024068 | 1.981982  |
| C | -8.412791 | -0.559562 | -2.157042 |
| H | -8.091193 | 0.437021  | -2.482458 |
| H | -8.862551 | -1.055815 | -3.026709 |
| H | -9.19641  | -0.432094 | -1.403266 |
| C | -3.802284 | 2.393195  | 2.798155  |
| H | -4.104142 | 2.326372  | 3.849104  |
| H | -3.070588 | 1.597682  | 2.612351  |
| H | -3.275575 | 3.34135   | 2.660451  |
| C | -6.385154 | 3.288254  | -1.544644 |
| H | -6.312988 | 4.3802    | -1.523168 |
| H | -5.604435 | 2.931035  | -2.226457 |
| H | -7.351757 | 3.019804  | -1.983336 |
| C | -8.419559 | 0.549241  | 2.15153   |
| H | -8.096943 | -0.443282 | 2.488026  |
| H | -8.876932 | 1.051749  | 3.013662  |
| H | -9.197749 | 0.412711  | 1.393736  |

**Compound (DPA)<sub>4</sub>-Per (DFT B3LYP/6-31+G(d,p), S<sub>0</sub>)**Total energy: -2356809.05 kcal mol<sup>-1</sup>

Dipole moment: 2.6740 D

| Symbol | X/Å         | Y/Å         | Z/Å         |
|--------|-------------|-------------|-------------|
| C      | 2.60953800  | 2.70118900  | -0.31451100 |
| C      | 2.51545800  | 1.30566500  | -0.09412100 |
| C      | 1.29588800  | 0.64924800  | -0.09917300 |
| C      | 0.09334500  | 1.40702700  | -0.21147400 |
| C      | 0.17815100  | 2.81909700  | -0.42534700 |
| C      | 1.44919400  | 3.43327100  | -0.52053500 |
| C      | -1.18950000 | 0.80601700  | -0.05695200 |
| C      | -2.32006000 | 1.60511700  | -0.07876500 |
| C      | -2.58126200 | -2.70395400 | 0.39116600  |
| C      | -1.00851500 | 3.58364500  | -0.52860700 |
| C      | 1.20729800  | -0.81331300 | 0.04950100  |
| C      | -0.07423700 | -1.41639300 | 0.21670200  |
| C      | -1.27671600 | -0.64988800 | 0.15173300  |
| C      | -0.15467200 | -2.83489800 | 0.39224100  |
| C      | -1.42486000 | -3.45702800 | 0.48612300  |
| C      | -2.24939800 | 2.99601300  | -0.32910500 |
| C      | -2.49410700 | -1.30075700 | 0.24264100  |
| C      | 2.33380700  | -1.61615900 | -0.02356700 |
| C      | 2.26505500  | -3.01668900 | 0.16863100  |
| C      | 1.03165000  | -3.60486600 | 0.41107400  |
| H      | 3.42427700  | 0.75582600  | 0.10455000  |
| H      | 1.50234200  | 4.50009500  | -0.70149400 |
| H      | -3.29051700 | 1.17327600  | 0.11286600  |
| H      | -0.93072400 | 4.64719200  | -0.72069100 |
| H      | -1.48237900 | -4.53494900 | 0.58946500  |
| H      | -3.42196600 | -0.75102500 | 0.16465000  |
| H      | 3.29320400  | -1.17865700 | -0.26002100 |
| H      | 0.95784400  | -4.67504200 | 0.56250600  |
| N      | -3.43440400 | 3.75930200  | -0.34700300 |
| N      | -3.86968200 | -3.28941000 | 0.38999200  |
| N      | 3.43597200  | -3.79280900 | 0.07972800  |
| N      | 3.86953700  | 3.32936900  | -0.29127400 |
| C      | 3.35992400  | -5.16593100 | -0.29148800 |
| C      | 4.02391300  | -6.13618900 | 0.47304200  |
| C      | 2.65201900  | -5.57010600 | -1.42528000 |
| C      | 3.98199400  | -7.47358900 | 0.10834900  |
| H      | 4.57927600  | -5.82562600 | 1.35147500  |
| C      | 2.58486100  | -6.91599300 | -1.78730400 |
| H      | 2.13682100  | -4.82503900 | -2.02152900 |
| C      | 3.25618800  | -7.87548200 | -1.02160700 |
| H      | 4.49280200  | -8.23148300 | 0.69222600  |
| H      | 2.02161200  | -7.19778300 | -2.66812000 |
| C      | 4.72962100  | -3.22573700 | 0.23665100  |
| C      | 5.74889600  | -3.56058000 | -0.65840400 |
| C      | 5.02716700  | -2.35078900 | 1.29509700  |
| C      | 7.04401700  | -3.07285800 | -0.49197100 |
| H      | 5.52900600  | -4.22702700 | -1.48487300 |

|   |             |              |             |
|---|-------------|--------------|-------------|
| C | 6.30707700  | -1.83559800  | 1.44798800  |
| H | 4.24719500  | -2.07945400  | 1.99790800  |
| C | 7.33280300  | -2.21219600  | 0.57083000  |
| H | 7.80985900  | -3.36476200  | -1.19895600 |
| H | 6.54307800  | -1.16183500  | 2.26427400  |
| O | 3.26513000  | -9.21516300  | -1.28884700 |
| C | 2.53844400  | -9.66769500  | -2.41835600 |
| H | 2.66732900  | -10.75033600 | -2.44741300 |
| H | 1.46976300  | -9.43278800  | -2.33232000 |
| H | 2.92482100  | -9.23276200  | -3.34915600 |
| C | 3.97622700  | 4.70707500   | 0.05392400  |
| C | 4.72176600  | 5.57716600   | -0.75477600 |
| C | 3.36629000  | 5.21320100   | 1.20373100  |
| C | 4.85380900  | 6.91612000   | -0.41807400 |
| H | 5.20133000  | 5.18733800   | -1.64614300 |
| C | 3.47377600  | 6.56352000   | 1.53810200  |
| H | 2.78863100  | 4.54604600   | 1.83397500  |
| C | 4.22439400  | 7.42213700   | 0.72763300  |
| H | 5.42823600  | 7.59689200   | -1.03680500 |
| H | 2.98203200  | 6.92630900   | 2.43200900  |
| C | 5.07579900  | 2.60655500   | -0.49439900 |
| C | 6.16968800  | 2.82881900   | 0.34603200  |
| C | 5.21426800  | 1.68397800   | -1.54526300 |
| C | 7.38631600  | 2.18294400   | 0.13264500  |
| H | 6.07209400  | 3.53077000   | 1.16658100  |
| C | 6.41314900  | 1.01288400   | -1.74377400 |
| H | 4.37467300  | 1.49864300   | -2.20603300 |
| C | 7.51743000  | 1.27543600   | -0.92227000 |
| H | 8.21449100  | 2.39053300   | 0.79790500  |
| H | 6.52606900  | 0.30103000   | -2.55401400 |
| C | -3.41564000 | 5.13919400   | 0.00090700  |
| C | -4.14081900 | 6.05610100   | -0.76164600 |
| C | -2.71348200 | 5.60179400   | 1.12548200  |
| C | -4.17744000 | 7.40872900   | -0.41983200 |
| H | -4.68980300 | 5.70197500   | -1.62764300 |
| C | -2.72664100 | 6.94740200   | 1.46012600  |
| H | -2.15000800 | 4.89709400   | 1.72665800  |
| C | -3.46094300 | 7.86218200   | 0.69212400  |
| H | -4.75239500 | 8.09256600   | -1.03165400 |
| H | -2.18525500 | 7.31501900   | 2.32512500  |
| C | -4.70625300 | 3.12504600   | -0.44268800 |
| C | -5.67373300 | 3.34056000   | 0.54051500  |
| C | -5.00908500 | 2.26608500   | -1.51165300 |
| C | -6.91790600 | 2.71347200   | 0.47368600  |
| H | -5.44894300 | 4.00540600   | 1.36729100  |
| C | -6.23633200 | 1.62040600   | -1.57717200 |
| H | -4.26362400 | 2.09338700   | -2.28029800 |
| C | -7.19715600 | 1.84076400   | -0.58105200 |
| H | -7.64500400 | 2.90108000   | 1.25378300  |
| H | -6.47329200 | 0.94854600   | -2.39386800 |
| C | -4.16119800 | -4.43209200  | 1.17125300  |
| C | -4.96301300 | -5.46768100  | 0.66287400  |
| C | -3.66563500 | -4.55121500  | 2.47422500  |
| C | -5.26317900 | -6.57724600  | 1.43961900  |

|   |              |             |             |
|---|--------------|-------------|-------------|
| H | -5.35271600  | -5.39190300 | -0.34587300 |
| C | -3.94406600  | -5.67590300 | 3.25061400  |
| H | -3.04739900  | -3.75892700 | 2.88105900  |
| C | -4.75237300  | -6.69567200 | 2.73821900  |
| H | -5.88334200  | -7.37826400 | 1.05177900  |
| H | -3.53741400  | -5.73506300 | 4.25260400  |
| C | -4.82004900  | -2.80336400 | -0.54903900 |
| C | -6.14207400  | -2.55001700 | -0.17485100 |
| C | -4.43152600  | -2.54305100 | -1.87302300 |
| C | -7.06570000  | -2.05119000 | -1.09483200 |
| H | -6.44798200  | -2.74207900 | 0.84806000  |
| C | -5.33660300  | -2.02614700 | -2.78631200 |
| H | -3.40787700  | -2.73868000 | -2.17208000 |
| C | -6.66209900  | -1.77976500 | -2.40616700 |
| H | -8.07735100  | -1.84249500 | -0.77207100 |
| H | -5.04323200  | -1.81658000 | -3.80927200 |
| O | 8.57851600   | -1.71659000 | 0.84385200  |
| O | -7.46839300  | -1.26038700 | -3.38093200 |
| O | -5.09694300  | -7.83384300 | 3.41612200  |
| O | 4.40191000   | 8.75604500  | 0.96425400  |
| O | 8.67931700   | 0.62592900  | -1.23951300 |
| O | -8.38101400  | 1.16379800  | -0.72361400 |
| O | -3.41432600  | 9.16249000  | 1.11073500  |
| C | -8.85495100  | -1.12413600 | -3.09343800 |
| H | -9.02278600  | -0.37890600 | -2.31077500 |
| H | -9.31990300  | -0.79036400 | -4.02230200 |
| H | -9.29306500  | -2.08541300 | -2.79536800 |
| C | -4.59670700  | -7.99086500 | 4.73142900  |
| H | -4.94932900  | -7.19273300 | 5.39791400  |
| H | -4.97581600  | -8.94945100 | 5.08838200  |
| H | -3.49904300  | -8.00771700 | 4.74869200  |
| C | 3.77156400   | 9.31331700  | 2.10460600  |
| H | 4.13577000   | 8.85512900  | 3.03324600  |
| H | 4.02673500   | 10.37375100 | 2.10376100  |
| H | 2.68046200   | 9.20367900  | 2.05756000  |
| C | 9.83831200   | 0.99312400  | -0.50898900 |
| H | 9.75024200   | 0.70618300  | 0.54509300  |
| H | 10.66800900  | 0.44978200  | -0.96257800 |
| H | 10.03124800  | 2.07074000  | -0.58142000 |
| C | -9.35176300  | 1.30401500  | 0.29906800  |
| H | -10.19018300 | 0.66823000  | 0.01057600  |
| H | -8.96369900  | 0.97315700  | 1.27048500  |
| H | -9.70058300  | 2.34067000  | 0.38731600  |
| C | -4.13363800  | 10.12317000 | 0.35743200  |
| H | -3.96583600  | 11.08197200 | 0.84960100  |
| H | -3.77171100  | 10.17961200 | -0.67726100 |
| H | -5.20966300  | 9.90616300  | 0.34651100  |
| C | 9.65136500   | -2.21434200 | 0.06067200  |
| H | 9.55656400   | -1.90262900 | -0.98563900 |
| H | 10.56052100  | -1.78572200 | 0.48390700  |
| H | 9.71018300   | -3.30862600 | 0.11407500  |

[1] A. Ranganathan, G. U. Kulkarni, *Proc. Indian Acad. Sci. (Chem. Sci.)* **2003**, *115*, 637.
